# Supplementary material for: Accurate allocation of multimapped reads enables regulatory element analysis at repeats
Source: HighWire-hosted journal article supplement (doi:10.1101/gr.278638.123), 2024-06-01
Supplement: Supplemental_Tables.xlsx [file Supplemental_Tables.xlsx]

## Sheet: Supplemental_Table_S1
Supplemental_Table_S1: Information for datasets used in CNN training, separated by assay type (transcription factor ChIP-seq, histone ChIP-seq, ATAC-seq, DNase-seq). Columns are experimental target (or assay), ENCODE ID, control ENCODE ID, starting read length in base pairs, read length remaining after trimming in base pairs.
Narrow
Target	ID	Control	Read length	Read length after trimming
FOXA1	ENCFF546MGM	ENCFF968ICP	100	50
SOX6	ENCFF042DKF	ENCFF968ICP	100	50
ELF4	ENCFF421RNZ	ENCFF968ICP	100	50
TBX3	ENCFF521BUZ	ENCFF968ICP	100	50
PAX8	ENCFF843MGJ	ENCFF968ICP	100	50
ZBTB40	ENCFF932AVU	ENCFF968ICP	100	50
ZNF24	ENCFF814CIF	ENCFF968ICP	100	50
NCOA1	ENCFF340KCA	ENCFF968ICP	100	50
STAT6	ENCFF698ZGJ	ENCFF968ICP	100	50
ZZZ3	ENCFF089GHF	ENCFF968ICP	100	50
Mixed
Target	ID	Control	Read length	Read length after trimming
H3K4me1	ENCFF444CBH	ENCFF494PEG	100	50
H3K36me3	ENCFF339FPW	ENCFF494PEG	100	50
H3K27ac	ENCFF709MXA	ENCFF438SRY	76	30
H3K79me2	ENCFF200AKD	ENCFF280YFB	76	30
H3K4me2	ENCFF976VRL	ENCFF280YFB	76	30
H3K9ac	ENCFF968WND	ENCFF280YFB	76	30
H2AFZ	ENCFF359IWW	ENCFF280YFB	76	30
H3K4me3	ENCFF851MKN	ENCFF438SRY	76	30
H3K27me3	ENCFF080NOR	ENCFF494PEG	100	50
ATAC
Target	ID	Control	Read length	Read length after trimming
DNase	ENCFF944VQR	None	151	30
DNase	ENCFF101ZMJ	None	101	30
DNase	ENCFF693HAU	None	36	30
DNase	ENCFF041DQI	None	101	30
DNase	ENCFF324AKV	None	101	30
DNase
Target	ID	Control	Read length	Read length after trimming
ATAC	ENCSR808HWS	None	100	30
ATAC	ENCFF309VMR	None	100	30
ATAC	ENCFF138ZLO	None	100	30
ATAC	ENCFF276DRS	None	100	30
ATAC	ENCFF261UXP	None	100	30

## Sheet: Supplemental_Table_S2
Supplemental_Table_S2: Information related to testing datasets. Columns are CNN type used, ChIP-seq target, source database, organism, database ID, control database ID, initial read length in base pairs.
CNN	Target	Database	Organism	ID	Control ID	Read length
narrow	EDM2	NCBI	arabidopsis	SRR8745833	SRR8745835	150
narrow	ELP1B	NCBI	arabidopsis	SRR24636333	SRR24636334	150
mixed	H3K9ac	NCBI	arabidopsis	SRR23350414	SRR23350416	150
mixed	H3K4me2	NCBI	arabidopsis	SRR19784283	None	150
mixed	ATAC_1	NCBI	arabidopsis	SRR27308509	None	50
narrow	unc	ENCODE	celegans	ENCFF709LEW	ENCFF496ZJW	101
narrow	isw	ENCODE	celegans	ENCFF560ORF	ENCFF835ZNH	101
mixed	H3K4me3	NCBI	celegans	SRR21931835	SRR21931849	40
mixed	H3K9me2	NCBI	celegans	SRR13964604	SRR13964596	51
mixed	ATAC_1	NCBI	celegans	SRR24491624	None	101
narrow	ctcf	NCBI	drosophila	SRR11283121	NONE	194
narrow	ken	ENCODE	drosophila	ENCFF068CJI	ENCFF617GRP	101
narrow	lov	ENCODE	drosophila	ENCFF219PRD	ENCFF506HPN	101
mixed	H3K27me3	NCBI	drosophila	SRR26350401	SRR26350377	51
mixed	H3K4me2	NCBI	drosophila	SRR26350385	SRR26350377	51
mixed	ATAC_1	NCBI	drosophila	SRR26349810	None	51
mixed	DNase_1	NCBI	drosophila	SRR6303532	None	121
mixed	DNase_2	NCBI	drosophila	SRR6303536	None	121
narrow	YY1	ENCODE	human	ENCFF561ORG	ENCFF873ZZU	101
narrow	RAD21	ENCODE	human	ENCFF777KWW	ENCFF055BIL	101
narrow	CTCF	ENCODE	human	ENCFF950MHM	ENCFF273KUS	100
mixed	H3K4me3	ENCODE	human	ENCFF827TNV	ENCFF468MPQ	100
mixed	H3K27me3	ENCODE	human	ENCFF080NOR	ENCFF494PEG	100
mixed	ATAC_1	ENCODE	human	ENCLB353JAI	None	100
mixed	ATAC_2	ENCODE	human	ENCLB774LNE	None	100
mixed	DNase_3	ENCODE	human	ENCFF037LYG	None	151
mixed	DNase_4	ENCODE	human	ENCFF608YCF	None	36
narrow	CTCF	ENCODE	mouse	ENCFF847BJO	ENCFF148ZUC	75
narrow	ZFP57	NCBI	mouse	SRR8329307	SRR8329315	150
narrow	DOTL1	NCBI	mouse	SRR18970080	SRR18970079	150
mixed	H3K4me3	ENCODE	mouse	ENCFF995MZR	ENCFF636CUM	50
mixed	H3K27ac	NCBI	mouse	SRR10597063	SRR10597062	150
mixed	ATAC_1	ENCODE	mouse	ENCLB774WKA	None	50
mixed	ATAC_2	ENCODE	mouse	ENCLB080OEI	None	50
mixed	DNase_1	ENCODE	mouse	ENCLB590ERB	None	151
mixed	DNase_2	ENCODE	mouse	ENCFF102VOP	None	151
narrow	MCM6	NCBI	yeast	SRR5833319	SRR5833301	101
narrow	CDC45	NCBI	yeast	SRR5833307	SRR5833295	101
mixed	H3K4me2	NCBI	yeast	SRR23085584	SRR23085543	66
mixed	H3K4me3	NCBI	yeast	SRR23085582	SRR23085543	66

## Sheet: Supplemental_Table_S3
Supplemental_Table_S3: Comparison between the auROC of the mixed peak neural network and the specialized neural networks (ATAC and DNase-seq) across all testing datasets in all species. The columns are species, dataset ID in training table, auROC from mixed peak neural network, and auROC from specialized neural network
Species	Dataset	auROC mixed	auROC specialized
arabidopsis	ATAC_1	0.973155	0.977925
celegans	ATAC_1	0.897505	0.85024
drosophila	ATAC_1	0.884928	0.795862
drosophila	DNase_1	0.659824	0.774124
drosophila	DNase_2	0.674356	0.778817
human	ATAC_1	0.986521	0.99895
human	ATAC_2	0.982325	0.98692
human	DNase_1	0.990713	0.993868
human	DNase_2	0.984211	0.993779
mouse	ATAC_1	0.791611	0.793863
mouse	ATAC_2	0.992786	0.99648
mouse	DNase_1	0.972094	0.853299
mouse	DNase_2	0.980541	0.896156
yeast	ATAC_1	0.909251	0.940639

## Sheet: Supplemental_Table_S4  
Supplemental_Table_S4: Comparison of auROCs across various percentages of read trimming in randomly selected testing datasets. Columns are ChIP-seq target, organism, starting read length, auROC at 20% read trimmed (auROC_20), auROC at 30% read trimmed (auROC_30), auROC at 40% read trimmed (auROC_40), auROC at 50% read trimmed (auROC_50)
Target	Organism	Starting read length (bp)	auROC_20	auROC_30	auROC_40	auROC_50
EDM2	arabidopsis	101	0.978016	0.974684	0.96612	NA
ELP1B	arabidopsis	150	0.957676	0.939926	0.933188	0.931614
unc	celegans	101	0.952293	0.96522	0.982189	0.950684
isw	celegans	101	0.953394	0.94423	0.928764	0.931032
ctcf	drosophila	194	0.893939	0.889432	0.87813	0.87634
ken	drosophila	101	0.979167	0.982249	0.979239	0.98338
YY1	human	101	0.997017	0.997017	0.997017	0.996
CTCF	human	100	0.995833	0.994773	0.9941	0.992886
CTCF	mouse	75	0.994351	0.993397	0.992132	0.991338
ZFP57	mouse	150	0.998572	0.988221	0.972071	0.954681

## Sheet: Supplemental_Table_S5
Supplemental_Table_S5: The results of 120 simulated ChIP-seq experiments in the comparison between Allo and SmartMap. Each row is the average value across 10 simulations. Columns are the simulated read length in base pairs (read_length), fraction of multi-mapped reads (fraction_mmr), fraction noise simulated (noise), the uniquely mapped read only percent error at multi-mapped peaks (umr_median_pe…
read_length	fraction_mmr	noise	umr_median_perc_error	allo_median_perc_error	sm_median_perc_error
20	0.277	0.8	0.453	0.258216	0.398964
30	0.212	0.8	0.497437	0.250423	0.400299
70	0.173	0.8	0.603249	0.298504	0.471181
90	0.173	0.8	0.494583	0.248924	0.40086
110	0.172	0.8	0.783285	0.337858	0.557517
150	0.163	0.8	0.809896	0.377325	0.615096
30	0.203	0.86	0.512042	0.255808	0.375727
30	0.198	0.9	0.514761	0.258529	0.375727
30	0.194	0.93	0.618575	0.254691	0.406044
30	0.19	0.96	0.678575	0.304691	0.404839
30	0.188	0.98	0.809896	0.377325	0.615096

## Sheet: Supplemental_Table_S6
Supplemental_Table_S6: Summary of 481 K562 datasets. Columns are the ChIP-seq target, experiment ENCODE ID, read length, sequencing type (Seq), number of uniquely mapped peaks (UMR), number of peaks after the inclusion of Allo (Allo), fraction overlap with transposable elements in uniquely mappable peaks (TE_UMR), fraction overlap with transposable elements in Allo-only peaks (TE_allo), fraction …
Target	ENCODE_ID	Read_length	Seq	UMR	Allo	TE_UMR	TE_allo	Para_allo	Para_UMR	Centro_allo	Centro_UMR	Telo_allo	Telo_UMR
ZBTB49	ENCSR249VFB	100	SINGLE	83	95	0.4096	0.75	0.625	0.0722	0	0	0	0
TGIF2	ENCSR028WJI	100	SINGLE	15	17	0.2666	0.75	0.5	0.0666	0	0	0	0
ZNF217	ENCSR841GLE	100	SINGLE	35	39	0.2857	0.25	0.5	0.0857	0	0	0	0
TFAP4	ENCSR784IMK	100	SINGLE	8916	9094	0.3432	0.4111	0.5482	0.1649	0	0	0	0
FOXM1	ENCSR429QPP	100	PAIRED	4887	4993	0.6286	0.7241	0.5431	0.1935	0	0	0	0
TEAD4	ENCSR817FMN	100	SINGLE	275	249	0.2981	0.4	0.4666	0.1236	0	0	0	0
ZBTB7A	ENCSR000BME	36	SINGLE	10278	10614	0.2631	0.4381	0.4811	0.1393	0	0	0	0
NR2F1	ENCSR970NKQ	100	PAIRED	29616	29537	0.7131	0.6788	0.5012	0.1721	0	0	0	0.0003
CTBP1	ENCSR201NQZ	100	PAIRED	20716	21034	0.6	0.5898	0.4971	0.1779	0.014	0.0002	0	0
AFF4	ENCSR436CZV	100	SINGLE	923	931	0.3596	0.5	0.5	0.1852	0	0	0	0
FOXP4	ENCSR084WHZ	100	SINGLE	848	780	0.257	0.5409	0.4426	0.1308	0	0	0	0
ETV6	ENCSR493JTJ	100	SINGLE	77	87	0.4545	0.6	0.4666	0.1558	0	0	0	0
NFRKB	ENCSR657EOF	100	PAIRED	11653	11800	0.7347	0.7195	0.492	0.1893	0.0105	0	0.0052	0.0012
NR1H2	ENCSR798MFW	100	SINGLE	195	233	0.3846	0.4901	0.4705	0.1692	0.0196	0	0	0
CDC5L	ENCSR121PFY	100	PAIRED	2042	2122	0.7757	0.7113	0.4742	0.1738	0.0206	0.0014	0	0
ERF	ENCSR225OGU	100	SINGLE	153	179	0.3071	0.3939	0.4242	0.1307	0	0	0	0
DDX20	ENCSR446LAV	100	PAIRED	3902	4000	0.6073	0.6283	0.4778	0.1855	0	0	0	0
AGO1	ENCSR641BSL	40	SINGLE	25699	25271	0.3408	0.4031	0.4517	0.1602	0.0057	0	0	0
TCF3	ENCSR970OJY	100	SINGLE	40104	40890	0.5798	0.5817	0.4727	0.1876	0.0011	0	0	0
ZKSCAN8	ENCSR755CRA	100	SINGLE	78	84	0.7948	0.6666	0.4444	0.1666	0	0	0	0
TAF1	ENCSR000BKS	36	SINGLE	17655	17990	0.4559	0.5935	0.4645	0.1883	0	0	0	0
ETS1	ENCSR000BKQ	36	SINGLE	5136	5201	0.3148	0.3813	0.4576	0.1822	0	0	0	0
ESRRA	ENCSR486IFJ	100	PAIRED	17169	17585	0.6593	0.6044	0.44	0.17	0.0266	0.0003	0	0.0001
RB1	ENCSR670JDQ	100	PAIRED	23184	23448	0.4521	0.4495	0.4252	0.1565	0.0395	0.0016	0	0
SMAD5	ENCSR000FCD	50	SINGLE	16711	17007	0.3571	0.4731	0.4516	0.1887	0.0021	0	0	0
MGA	ENCSR710WLO	100	PAIRED	27256	27813	0.677	0.7203	0.4375	0.1759	0.0142	0.0004	0	0.0001
ATF3	ENCSR028UIU	100	PAIRED	38989	39579	0.7135	0.6567	0.4414	0.1816	0.0436	0.0008	0	0
GTF2E2	ENCSR532KTI	50	SINGLE	801	890	0.4831	0.4646	0.4848	0.2259	0	0	0	0
FIP1L1	ENCSR177DNR	40	SINGLE	4933	4868	0.3614	0.4542	0.4406	0.1848	0	0.0002	0	0
POLR2H	ENCSR400FSM	100	PAIRED	12386	12425	0.7614	0.7818	0.4517	0.1962	0.0482	0.0021	0	0
EZH2	ENCSR000AQE	36	SINGLE	674	432	0.2952	0.3246	0.3766	0.1231	0	0	0	0
POLR2B	ENCSR325RLL	100	PAIRED	29940	30387	0.7496	0.6733	0.4656	0.2127	0	0	0	0.0001
NCOR1	ENCSR798ILC	100	PAIRED	18452	18682	0.7004	0.6295	0.4427	0.1904	0.006	0	0	0
TOE1	ENCSR213HBY	100	PAIRED	11408	11756	0.7948	0.7194	0.4337	0.1822	0	0	0.0025	0.0006
HDAC1	ENCSR711VWL	100	PAIRED	31683	32204	0.6928	0.6568	0.433	0.1836	0	0	0	0
NR4A1	ENCSR000DJW	36	SINGLE	113	160	0.4716	0.4679	0.4228	0.1737	0.0485	0.0022	0	0
NR2C1	ENCSR742IDN	100	PAIRED	9304	9511	0.6211	0.6822	0.4237	0.1751	0.0084	0.0002	0.0042	0.0012
TRIM28	ENCSR474CVP	100	PAIRED	44299	43644	0.7967	0.7265	0.428	0.1802	0.0237	0.0009	0	0
HDAC2	ENCSR893WSB	100	PAIRED	98059	96406	0.7746	0.7374	0.4112	0.1715	0.0008	0.0001	0	0
GABPA	ENCSR290MUH	50	SINGLE	10647	10836	0.5964	0.5796	0.4292	0.1897	0	0	0	0
KLF16	ENCSR760UVO	50	SINGLE	23890	24318	0.4247	0.5977	0.4037	0.1648	0.0057	0	0	0
ZEB2	ENCSR322CFO	100	PAIRED	13813	14155	0.6415	0.6518	0.4109	0.1737	0.0104	0.0004	0	0
ZNF609	ENCSR940PYZ	100	SINGLE	508	553	0.3917	0.4155	0.4155	0.1791	0	0	0	0
FOXK1	ENCSR659CCI	100	SINGLE	893	929	0.3001	0.3801	0.4297	0.1937	0	0	0	0
SFPQ	ENCSR647PJW	40	SINGLE	103	123	0.5533	0.5357	0.5357	0.3009	0	0.0097	0	0
MBD1	ENCSR158BGH	100	PAIRED	21625	20656	0.6758	0.6171	0.3963	0.1637	0.0135	0.0006	0	0
ZBTB12	ENCSR172OSX	100	PAIRED	16288	16138	0.5585	0.5171	0.408	0.1774	0.1059	0.0007	0	0
ZBTB33	ENCSR876GXA	100	PAIRED	118833	120181	0.8663	0.7664	0.4314	0.2014	0	0	0	0
ZNF23	ENCSR898IDK	100	PAIRED	536	522	0.8395	0.7142	0.3571	0.1287	0	0	0	0
HCFC1	ENCSR000EFN	36	SINGLE	25090	25810	0.3867	0.4762	0.3895	0.1616	0	0	0	0
MTA1	ENCSR807BGP	100	PAIRED	35794	36604	0.6963	0.6585	0.3944	0.1685	0.0106	0.0003	0	0
SP1	ENCSR372IML	100	SINGLE	15681	16292	0.516	0.5138	0.4	0.1742	0.0722	0.0049	0	0
CREM	ENCSR077DKV	50	SINGLE	78555	80426	0.4347	0.4997	0.396	0.1705	0.0004	0	0	0
HMBOX1	ENCSR757IIU	50	SINGLE	32717	33569	0.6194	0.6984	0.4226	0.1995	0	0	0	0.0004
BRD9	ENCSR177XCS	100	PAIRED	9386	9587	0.7322	0.6899	0.3973	0.1747	0.0043	0.0001	0.0043	0.0003
MAZ	ENCSR643JRH	101	PAIRED	22304	22643	0.6257	0.4163	0.4021	0.1799	0.1601	0.0044	0	0
SUPT5H	ENCSR894CGX	100	PAIRED	57201	58083	0.8094	0.7396	0.4496	0.2278	0	0	0	0
SMC3	ENCSR000EGW	36	SINGLE	37946	38991	0.393	0.4438	0.3789	0.158	0.0008	0	0	0
PBX2	ENCSR263DFP	100	PAIRED	50823	51553	0.6507	0.5579	0.413	0.1921	0.1545	0.0047	0	0
MEIS2	ENCSR851BNE	100	PAIRED	31356	31805	0.5965	0.5147	0.4142	0.1936	0.1065	0.0016	0	0
MCM7	ENCSR068VRA	100	PAIRED	168	202	0.6845	0.619	0.2619	0.0416	0.0714	0.0238	0	0.0119
TCF12	ENCSR744WOO	100	PAIRED	13718	13807	0.7504	0.7822	0.4088	0.1885	0.0044	0	0	0
CBFA2T3	ENCSR697YLJ	100	PAIRED	48277	48887	0.71	0.6291	0.4054	0.1855	0.0476	0.0004	0	0
PRDM10	ENCSR120MPG	100	PAIRED	25898	26259	0.6197	0.5946	0.3859	0.1661	0.0606	0.0005	0	0.0005
NFATC3	ENCSR051OUX	100	PAIRED	1563	1652	0.7172	0.6952	0.419	0.2002	0	0.0012	0	0.0006
KDM1A	ENCSR360HRA	100	PAIRED	24502	25026	0.7729	0.75	0.3775	0.1597	0.0119	0.0005	0.0017	0.0001
ZNF232	ENCSR360ECJ	100	SINGLE	664	677	0.3629	0.4848	0.3939	0.1762	0	0	0	0
ZNF263	ENCSR845GGY	100	SINGLE	8440	8968	0.4896	0.4786	0.375	0.1575	0	0	0	0
HNRNPL	ENCSR594BNR	40	SINGLE	4032	4201	0.3923	0.3981	0.392	0.1746	0	0.0002	0	0
EP400	ENCSR817QKV	100	PAIRED	20147	20736	0.6644	0.6748	0.4175	0.202	0.003	0	0	0.0003
FUS	ENCSR051DXE	40	SINGLE	1082	1205	0.4426	0.5942	0.413	0.1977	0	0.0009	0	0
E2F6	ENCSR000BLI	36	SINGLE	25938	27052	0.3833	0.4869	0.3846	0.17	0	0.0002	0	0
ZNF224	ENCSR409PXW	100	SINGLE	234	246	0.423	0.5909	0.3636	0.1495	0	0	0	0
MLLT1	ENCSR107GRP	100	PAIRED	58043	58923	0.7639	0.7491	0.3939	0.1799	0.0008	0	0	0.0001
GABPB1	ENCSR138YYY	100	PAIRED	17933	18286	0.6327	0.5759	0.4057	0.1926	0.0183	0.0001	0	0
FOXJ2	ENCSR847LBF	50	SINGLE	1769	1826	0.5076	0.6202	0.3797	0.1667	0	0	0	0
SMARCA5	ENCSR895HSJ	100	PAIRED	65815	65209	0.8773	0.8136	0.3792	0.1685	0.0014	0.0001	0	0
GTF2B	ENCSR000DOE	34	SINGLE	662	735	0.4803	0.5256	0.4102	0.2009	0.0128	0.0015	0	0
HES1	ENCSR091JXL	100	PAIRED	6410	6652	0.6124	0.621	0.375	0.1659	0.0273	0.0014	0	0
SMARCE1	ENCSR157TCS	100	PAIRED	76236	77342	0.7537	0.7137	0.3901	0.181	0.0029	0	0.0014	0.0001
TAL1	ENCSR106FRG	100	PAIRED	12561	13150	0.6851	0.8467	0.3807	0.1717	0	0	0	0
ZFX	ENCSR628DJK	100	SINGLE	18367	18762	0.5501	0.5401	0.3905	0.1819	0.0273	0	0	0
ETV5	ENCSR971EWR	100	SINGLE	9955	10168	0.5526	0.5342	0.3951	0.1871	0	0	0	0
SMARCA4	ENCSR587OQL	100	PAIRED	90184	91235	0.7637	0.7049	0.3933	0.1857	0.0014	0	0	0
PKNOX1	ENCSR115SMW	100	PAIRED	61760	62915	0.6815	0.6497	0.3899	0.1831	0	0	0	0
BCOR	ENCSR808AKZ	100	PAIRED	111573	113145	0.9	0.8714	0.3666	0.1602	0.0026	0	0	0
TRIM24	ENCSR907MZR	100	PAIRED	13627	14003	0.7625	0.633	0.3866	0.1803	0	0	0	0.0003
PML	ENCSR000BQY	36	SINGLE	45088	46710	0.5032	0.6254	0.3903	0.1864	0.0004	0	0	0
L3MBTL2	ENCSR530XQI	100	PAIRED	35555	36296	0.6678	0.5927	0.3819	0.1782	0.0566	0.0017	0	0
E2F4	ENCSR368GJN	100	SINGLE	1255	1455	0.3035	0.3463	0.3891	0.1856	0	0	0	0
EHMT2	ENCSR175EOM	100	PAIRED	11990	12300	0.7582	0.657	0.3717	0.1687	0.0115	0.0002	0	0.0004
ARNT	ENCSR613NUC	100	PAIRED	9118	9420	0.7547	0.6727	0.3878	0.1864	0	0	0	0.0002
CBFB	ENCSR116NDV	100	SINGLE	3354	3517	0.324	0.4022	0.3733	0.1726	0	0	0	0
SOX6	ENCSR788RSW	100	PAIRED	49923	50988	0.63	0.5719	0.389	0.1883	0.1246	0.0026	0	0
ZNF316	ENCSR167KBO	100	PAIRED	59622	60372	0.7269	0.6298	0.3977	0.1976	0.0238	0.0002	0	0
U2AF2	ENCSR479QAJ	40	SINGLE	18	25	0.4444	0.4	0.2	0	0	0.0555	0	0
SAFB	ENCSR072VUO	40	SINGLE	2137	2335	0.3172	0.5	0.3571	0.1576	0	0.0004	0	0
DPF2	ENCSR219BXP	100	PAIRED	47289	48089	0.7516	0.6842	0.3762	0.1794	0	0	0	0
RAD51	ENCSR524BUE	100	PAIRED	5915	6015	0.6644	0.7378	0.3495	0.1535	0.0097	0.0001	0	0
ZNF143	ENCSR427WZJ	100	SINGLE	3129	3217	0.5723	0.4369	0.3697	0.1741	0	0	0	0
NCOA1	ENCSR658WFQ	100	PAIRED	28877	29520	0.648	0.6531	0.3672	0.1728	0.0135	0.0008	0	0.0002
SPI1	ENCSR000BGW	36	SINGLE	22434	23113	0.4939	0.7269	0.3601	0.1661	0	0	0	0
USF1	ENCSR000BKT	36	SINGLE	48871	49233	0.5797	0.6758	0.3577	0.1646	0.0003	0	0.0003	0
HDGF	ENCSR563YDA	100	PAIRED	15759	16186	0.7292	0.6673	0.3509	0.158	0	0	0	0
HBP1	ENCSR103TYK	101	PAIRED	8826	8795	0.648	0.575	0.3664	0.1743	0.0585	0.007	0.0025	0.001
POLR2G	ENCSR283ZRI	40	SINGLE	55813	57694	0.5048	0.6028	0.3911	0.2009	0	0	0	0
SNRNP70	ENCSR754ZHU	40	SINGLE	335	388	0.4417	0.5652	0.3333	0.1432	0	0.0029	0	0
IKZF1	ENCSR948VFL	100	PAIRED	93048	94485	0.7471	0.7124	0.3602	0.1704	0.0034	0	0	0
RBFOX2	ENCSR822LBD	40	SINGLE	43818	45230	0.611	0.6909	0.3719	0.1823	0	0	0	0
NR2F2	ENCSR000BRS	36	SINGLE	69312	72469	0.5135	0.7225	0.354	0.1644	0.0002	0	0	0
LCOR	ENCSR672OHP	100	SINGLE	1793	1945	0.3586	0.4802	0.3728	0.1846	0	0	0	0
ZNF121	ENCSR799URB	100	SINGLE	16081	16231	0.9825	0.9388	0.3537	0.1659	0.0026	0	0	0
ATF4	ENCSR145TSJ	100	PAIRED	28204	28623	0.7654	0.73	0.3761	0.1889	0.0044	0.0002	0	0
MNT	ENCSR512NLO	100	PAIRED	33513	34205	0.6763	0.6457	0.3726	0.1859	0.0209	0.0005	0	0.0001
SMAD4	ENCSR109SJT	100	PAIRED	27979	28672	0.6774	0.5259	0.3678	0.1812	0.1774	0.0045	0	0
POLR3A	ENCSR000DOI	27	SINGLE	573	693	0.9808	0.9203	0.3362	0.15	0	0	0	0
ARID1B	ENCSR822CCM	100	PAIRED	47905	48691	0.7348	0.6872	0.3668	0.1812	0	0	0	0
ZBED1	ENCSR286PCG	50	SINGLE	1507	1607	0.4054	0.4137	0.3735	0.1884	0	0	0	0
BHLHE40	ENCSR000EGV	36	SINGLE	31667	31828	0.4421	0.5883	0.3477	0.1629	0	0	0	0
ZNF12	ENCSR041YBR	100	SINGLE	12063	12118	0.4419	0.5696	0.3398	0.157	0	0	0	0
GATAD2B	ENCSR547LKC	100	PAIRED	9183	9527	0.477	0.4481	0.3575	0.1753	0.0051	0.0003	0	0.0001
RBBP5	ENCSR000AQI	36	SINGLE	61970	64776	0.5244	0.6242	0.3475	0.1657	0.002	0	0.0002	0
MTA2	ENCSR411UYA	100	PAIRED	17232	17710	0.6572	0.6406	0.3411	0.1599	0	0	0	0.0002
ZNF83	ENCSR257XVY	50	SINGLE	1952	2046	0.6501	0.6412	0.3511	0.1736	0.0076	0	0.0076	0
ASH1L	ENCSR115BBC	100	PAIRED	9381	9898	0.6584	0.6757	0.36	0.1829	0.0494	0.0079	0	0.0001
GATA2	ENCSR257RKC	100	SINGLE	7626	7840	0.5731	0.6253	0.3587	0.1817	0.0031	0	0	0
GMEB1	ENCSR928KOR	100	PAIRED	30051	30744	0.6838	0.6451	0.3512	0.1747	0.0085	0.0002	0	0.0001
NUFIP1	ENCSR574XEO	100	PAIRED	559	607	0.7048	0.6428	0.3571	0.1806	0	0	0.0178	0.0196
CHD2	ENCSR000EHD	36	SINGLE	11699	12085	0.4358	0.5321	0.3428	0.167	0.0017	0	0	0
STAG1	ENCSR153HNT	100	SINGLE	3962	4362	0.3235	0.3619	0.3078	0.1322	0	0	0	0
ZBTB2	ENCSR230PTV	100	PAIRED	11385	11675	0.6729	0.6617	0.3442	0.17	0.0029	0.0001	0	0
NFXL1	ENCSR085DDI	100	PAIRED	1915	1940	0.7268	0.5571	0.3285	0.1556	0	0	0	0.0005
MAFG	ENCSR818DQV	100	PAIRED	30903	31203	0.7178	0.6246	0.3603	0.1877	0.1471	0.0023	0	0
DMTF1	ENCSR015KAM	100	SINGLE	485	514	0.3505	0.3148	0.3518	0.1793	0.0185	0	0	0
FOXP1	ENCSR530WIV	100	SINGLE	3042	3124	0.3517	0.3882	0.3617	0.1893	0	0	0	0
E2F1	ENCSR563LLO	100	PAIRED	2510	2574	0.4394	0.3164	0.3544	0.182	0.3164	0.0219	0	0
ZKSCAN1	ENCSR882ERE	36	SINGLE	16662	17046	0.5309	0.5246	0.3251	0.1534	0	0	0.0012	0
NRF1	ENCSR494TDU	100	PAIRED	19264	19705	0.635	0.5401	0.3634	0.1917	0.0783	0.0066	0	0
MAFK	ENCSR000EGX	36	SINGLE	17343	17788	0.4912	0.5685	0.348	0.1763	0.0015	0.0001	0	0
YY1	ENCSR000BKU	36	SINGLE	47785	45623	0.427	0.5912	0.3356	0.1651	0	0	0	0
ZNF281	ENCSR214EKV	100	PAIRED	34794	35621	0.7224	0.4716	0.3488	0.1787	0.2941	0.0048	0	0
ARID2	ENCSR491EBY	100	PAIRED	2596	2755	0.5389	0.5263	0.3157	0.1456	0.0233	0.0007	0	0.0011
SAP30	ENCSR000AQJ	36	SINGLE	25846	25547	0.438	0.4986	0.3426	0.1738	0.0292	0	0.0006	0
SRF	ENCSR582IAO	75	SINGLE	18670	19019	0.403	0.4096	0.335	0.1666	0	0	0	0
MCM3	ENCSR990AZC	100	PAIRED	2568	2639	0.7472	0.5696	0.2995	0.1312	0.059	0.0038	0	0.0035
CREB3L1	ENCSR109YGM	100	PAIRED	19495	20016	0.6154	0.487	0.3506	0.1832	0.2175	0.0189	0	0
KAT7	ENCSR924JOW	100	SINGLE	6	11	0	0	0.5	0.3333	0	0	0	0
ATF6	ENCSR125RFR	100	SINGLE	958	1020	0.2557	0.3333	0.3397	0.1732	0.0064	0	0	0
CC2D1A	ENCSR343IFJ	100	PAIRED	10202	10581	0.7057	0.6928	0.3341	0.1685	0.0049	0.0002	0	0.0003
TFDP1	ENCSR017GBO	50	SINGLE	10241	10742	0.6005	0.6072	0.3422	0.1768	0	0	0	0
ELF1	ENCSR502OEK	100	PAIRED	6895	7058	0.5543	0.5418	0.3519	0.1868	0.0279	0.0018	0.0055	0.0002
MCM2	ENCSR552PSV	100	PAIRED	2422	2607	0.6238	0.4059	0.3034	0.1387	0.0854	0.0057	0	0.0033
AFF1	ENCSR426URK	100	PAIRED	33011	34164	0.7313	0.7952	0.3474	0.1833	0.0101	0.0005	0	0
THAP1	ENCSR000BNN	36	SINGLE	37326	28513	0.2727	0.4368	0.3229	0.1595	0	0	0	0
ZNF148	ENCSR018MSO	50	SINGLE	9086	9400	0.6169	0.7082	0.3286	0.166	0.0028	0.0001	0	0
BRCA1	ENCSR946BXO	100	SINGLE	92	208	0.3913	0.4193	0.3145	0.1521	0	0	0	0
MXI1	ENCSR000EGZ	36	SINGLE	11987	12282	0.2855	0.3664	0.3314	0.171	0	0	0	0
POLR2AphosphoS5	ENCSR000BKR	36	SINGLE	173520	173975	0.5713	0.7352	0.3668	0.2066	0	0	0.0002	0
ATF1	ENCSR085XDP	100	SINGLE	1520	1520	0.2782	0.3125	0.3541	0.194	0	0	0	0
ZNF592	ENCSR249BHQ	100	PAIRED	48711	49673	0.7174	0.5785	0.3551	0.195	0.0331	0.0005	0	0
UBTF	ENCSR000EFZ	36	SINGLE	15710	16214	0.2945	0.4287	0.3405	0.1812	0.0135	0.0003	0	0
ZFP91	ENCSR898XMH	100	PAIRED	8495	8736	0.7513	0.6415	0.3283	0.1698	0.0037	0	0	0.0002
ZNF431	ENCSR609ZLF	100	SINGLE	4314	4505	0.7568	0.6387	0.3155	0.1587	0	0	0	0
SIN3A	ENCSR920BLG	36	SINGLE	24130	25157	0.4142	0.4361	0.3318	0.1755	0.0364	0	0.0007	0
MIER1	ENCSR426MDV	100	PAIRED	27121	28187	0.7505	0.693	0.3183	0.1621	0.0351	0.0037	0	0.0001
RBM34	ENCSR899GSH	40	SINGLE	19	51	0.3157	0.5937	0.1562	0	0	0.0526	0	0
NKRF	ENCSR331BDJ	100	PAIRED	7181	7434	0.5124	0.5119	0.3447	0.1885	0	0.0001	0	0.0004
SRSF3	ENCSR268QIQ	40	SINGLE	24377	26184	0.3769	0.5892	0.3161	0.1609	0.0003	0	0	0
ZBTB9	ENCSR536CBU	101	PAIRED	14542	15098	0.538	0.4064	0.3328	0.1779	0.1273	0.0077	0	0
ZNF639	ENCSR497VFH	100	PAIRED	2002	2108	0.5934	0.507	0.345	0.1923	0.007	0	0	0.0004
MAFF	ENCSR000EGI	36	SINGLE	20175	20672	0.5439	0.6231	0.3357	0.1831	0.0029	0.0001	0.0014	0.0001
CBFA2T2	ENCSR699PVC	100	PAIRED	18338	18612	0.6963	0.7315	0.3355	0.183	0.0134	0.0001	0	0
SP2	ENCSR000BNL	36	SINGLE	4007	3912	0.2969	0.5981	0.3202	0.1679	0	0	0	0
PTBP1	ENCSR948KMB	40	SINGLE	3374	3604	0.6719	0.7097	0.2928	0.1419	0	0.0002	0	0
NBN	ENCSR085QEV	100	PAIRED	33634	34471	0.6869	0.6892	0.3326	0.1818	0.001	0	0	0.0005
HLTF	ENCSR090JNM	100	PAIRED	5460	5741	0.7836	0.6785	0.3214	0.1706	0	0	0	0.001
NFE2	ENCSR000FCC	50	SINGLE	56575	57893	0.5271	0.5531	0.3316	0.1812	0.0034	0.0001	0	0
C11orf30	ENCSR350XWY	100	PAIRED	78444	79388	0.6991	0.6596	0.3517	0.2014	0.0247	0.0003	0	0
E2F5	ENCSR709DRM	50	SINGLE	10866	11519	0.5655	0.5794	0.3166	0.1669	0	0	0.0012	0
KHSRP	ENCSR686EYO	100	PAIRED	8410	8914	0.6343	0.6559	0.3691	0.2196	0.0304	0.002	0	0.0001
PCBP1	ENCSR052PTN	40	SINGLE	5290	5701	0.4625	0.4543	0.3333	0.1852	0.0088	0.0003	0	0
ZFP36	ENCSR776CYN	36	SINGLE	78827	81167	0.5915	0.595	0.2884	0.1404	0.0013	0	0	0
ARID3A	ENCSR000EFY	36	SINGLE	9115	9440	0.5261	0.6464	0.3333	0.1866	0.0025	0	0	0
CEBPB	ENCSR000BRQ	36	SINGLE	63657	66604	0.5832	0.7856	0.3236	0.1771	0.0002	0	0.0002	0
XRCC5	ENCSR506KWJ	40	SINGLE	4483	4774	0.3586	0.5326	0.2929	0.1465	0.0048	0.0011	0	0
FOXK2	ENCSR508DQA	100	PAIRED	19921	20531	0.6229	0.6225	0.3268	0.1829	0	0.0001	0	0.0001
ZBTB17	ENCSR026KKZ	101	PAIRED	14002	14372	0.5675	0.4946	0.3176	0.1739	0.1449	0.0102	0	0.0001
CCNT2	ENCSR000DOA	36	SINGLE	23131	24468	0.4637	0.493	0.3301	0.1875	0.0054	0.0003	0	0
HMGN3	ENCSR000DOB	36	SINGLE	22593	23798	0.3634	0.3976	0.3251	0.1831	0	0.0001	0	0
ZBTB5	ENCSR786OQY	100	PAIRED	1487	1562	0.6617	0.7634	0.301	0.1607	0	0.002	0	0.002
NFYA	ENCSR163VTS	100	SINGLE	5748	5904	0.5445	0.5377	0.3022	0.1633	0	0	0	0
DNMT1	ENCSR987PBI	100	PAIRED	157	195	0.5859	0.6341	0.317	0.1783	0	0	0	0
SMAD1	ENCSR038DJJ	36	SINGLE	7406	6987	0.2761	0.4357	0.3103	0.172	0	0	0	0
ZC3H4	ENCSR419CNA	100	SINGLE	777	897	0.3706	0.4825	0.3604	0.2226	0	0	0	0
ZNF175	ENCSR011PEI	50	SINGLE	10478	10822	0.6354	0.6368	0.3091	0.1713	0	0	0.0018	0
NEUROD1	ENCSR986CDX	36	SINGLE	9606	9870	0.4027	0.4566	0.3074	0.1706	0	0	0	0
GTF2I	ENCSR653WFU	100	PAIRED	11500	11830	0.9253	0.6701	0.2664	0.131	0.1873	0.009	0	0
NCOA2	ENCSR803EKW	100	PAIRED	1302	1405	0.5944	0.641	0.3162	0.182	0.017	0.0046	0.0085	0.0023
E2F8	ENCSR953DVM	100	PAIRED	9049	9355	0.5946	0.6139	0.3161	0.183	0	0.0002	0	0.0007
ZNF407	ENCSR011NOZ	100	PAIRED	1460	1527	0.6102	0.7027	0.3108	0.178	0	0	0	0
ZC3H8	ENCSR143CEO	100	PAIRED	334	379	0.7784	0.7115	0.3653	0.2335	0	0	0	0.0029
ZNF7	ENCSR454SCH	100	SINGLE	29944	30178	0.491	0.7249	0.2935	0.1638	0	0	0	0
HMG20A	ENCSR626HJW	100	SINGLE	10087	10328	0.5445	0.4976	0.306	0.1768	0	0	0	0
POLR2A	ENCSR000BMR	36	SINGLE	120697	127201	0.5668	0.7404	0.3299	0.2008	0	0	0	0
MYBL2	ENCSR162IEM	100	PAIRED	1890	1992	0.5682	0.5945	0.3513	0.2222	0.1081	0.0037	0	0.001
ZBTB43	ENCSR800KMQ	100	SINGLE	584	621	0.5462	0.507	0.2957	0.1678	0	0	0	0
CSDE1	ENCSR626QJQ	100	PAIRED	2327	2564	0.7554	0.7158	0.2988	0.1718	0.0405	0.0111	0	0.0004
SIN3B	ENCSR657JLK	100	PAIRED	5227	5447	0.4021	0.279	0.3372	0.2108	0.3139	0.0044	0	0
ZBTB26	ENCSR115HLM	101	PAIRED	6722	7063	0.6756	0.6019	0.3021	0.1765	0.0455	0.0056	0	0.0017
ZNF197	ENCSR580IAO	50	SINGLE	1657	1719	0.6288	0.6756	0.2612	0.1363	0	0.0006	0	0
KAT8	ENCSR086FZL	100	PAIRED	794	847	0.4836	0.4915	0.3389	0.2141	0.1525	0.0302	0	0
MBD2	ENCSR221GAN	50	SINGLE	13605	14187	0.3303	0.4656	0.3034	0.1791	0.0105	0	0	0
ZNF317	ENCSR976MXN	100	SINGLE	23979	24647	0.7001	0.6112	0.3188	0.1945	0.0456	0.0026	0	0
OTX1	ENCSR475ZYA	101	PAIRED	7435	7897	0.6043	0.4964	0.2875	0.1651	0.0982	0.0146	0	0.0016
HDAC3	ENCSR024LKA	100	PAIRED	9666	10467	0.621	0.5776	0.3235	0.2014	0.127	0.0039	0	0
DACH1	ENCSR030TJP	100	PAIRED	14621	14930	0.6779	0.4619	0.2989	0.1773	0.2445	0.0046	0	0
RNF2	ENCSR820GND	100	PAIRED	11094	11487	0.7982	0.7151	0.3059	0.1847	0.0548	0.0018	0	0
TBP	ENCSR000EHA	36	SINGLE	28620	29922	0.5016	0.6149	0.2908	0.1704	0.0104	0.0005	0	0
TEAD1	ENCSR591ASD	101	PAIRED	7377	7649	0.5719	0.4824	0.2907	0.1706	0.1246	0.0098	0	0.0001
FOS	ENCSR000DKB	36	SINGLE	11257	11789	0.481	0.5857	0.2766	0.1572	0	0	0	0
ZNF184	ENCSR546IHU	100	PAIRED	5092	5485	0.868	0.8807	0.3096	0.1908	0.0022	0.0003	0.0045	0.0017
ZNF282	ENCSR229KXQ	100	SINGLE	180	240	0.2277	0.4285	0.2571	0.1388	0	0	0	0
ZNF274	ENCSR000EWE	32	SINGLE	206	262	0.2087	0.2295	0.3606	0.2427	0.0163	0	0	0
HMGXB4	ENCSR279IMD	100	SINGLE	19121	19361	0.5071	0.4847	0.3132	0.1968	0.0622	0.0036	0	0
THRA	ENCSR264CZJ	100	PAIRED	580	636	0.6189	0.5483	0.2903	0.1741	0.1935	0.0137	0	0.0051
MCM5	ENCSR628APV	100	PAIRED	863	1002	0.6187	0.5325	0.2307	0.1147	0.1065	0.0231	0	0.0104
STAT5A	ENCSR000BRR	36	SINGLE	17967	18908	0.5269	0.5941	0.2983	0.1825	0.0189	0	0	0
PHB2	ENCSR924GXX	100	PAIRED	2111	2214	0.7044	0.689	0.2941	0.1785	0	0.0004	0.0084	0.0009
RAD21	ENCSR000FAD	34	SINGLE	22059	22680	0.3686	0.4	0.2765	0.1613	0.016	0.0006	0	0
POLR2AphosphoS2	ENCSR000EGF	36	SINGLE	104161	109981	0.635	0.6844	0.3236	0.2088	0	0	0	0
NR3C1	ENCSR494UQJ	100	PAIRED	4207	4508	0.7119	0.6342	0.2714	0.1566	0.06	0.0095	0	0.0007
LARP7	ENCSR288MOZ	100	PAIRED	3111	3385	0.7868	0.7315	0.2852	0.171	0.0033	0.0003	0	0.0016
EGR1	ENCSR024CNP	100	PAIRED	35236	35171	0.5968	0.3796	0.2862	0.1727	0.323	0.0085	0	0
ZNF583	ENCSR775EQV	100	PAIRED	2579	2826	0.6215	0.3409	0.2651	0.1516	0.2689	0.0131	0	0
TRIM25	ENCSR213VUI	100	PAIRED	7315	7774	0.755	0.7007	0.2708	0.1591	0.0549	0.005	0	0.0004
ZNF511	ENCSR652OGX	100	SINGLE	10290	11303	0.419	0.4	0.3011	0.1896	0	0	0	0
ATF7	ENCSR972ZBV	100	PAIRED	28001	28731	0.6906	0.4034	0.2928	0.1821	0.3791	0.0222	0	0
ZNF644	ENCSR729HVR	50	SINGLE	2168	2311	0.6406	0.6374	0.2573	0.1476	0	0.0004	0	0
MAX	ENCSR000BLP	36	SINGLE	73976	79546	0.4938	0.5697	0.2762	0.1667	0.0007	0	0	0
KLF1	ENCSR550HCT	100	PAIRED	10222	10633	0.5226	0.3908	0.2869	0.1775	0.3076	0.0209	0	0
SIX5	ENCSR000BNW	36	SINGLE	3151	3269	0.3154	0.3103	0.2689	0.1596	0	0	0	0
ZMYM3	ENCSR102KIN	76	SINGLE	35460	37496	0.9765	0.9715	0.2575	0.1492	0.0004	0	0	0
ELF4	ENCSR498JCG	76	SINGLE	4718	4962	0.2852	0.419	0.2825	0.1757	0.019	0	0	0
ZNF124	ENCSR124YFA	100	SINGLE	216	256	0.5879	0.6086	0.2826	0.1759	0	0.0046	0	0
CBX3	ENCSR000BRT	36	SINGLE	111074	116949	0.6384	0.7611	0.2708	0.1651	0.0011	0	0.0001	0
ZNF239	ENCSR606KTL	100	PAIRED	18009	18653	0.5891	0.3994	0.2688	0.1633	0.3239	0.0171	0	0
TFCP2	ENCSR998OMC	151	PAIRED	3188	3316	0.4924	0.4189	0.3016	0.1966	0.1452	0.0294	0	0.0003
SUZ12	ENCSR412CTM	36	SINGLE	9853	10029	0.3105	0.3489	0.2334	0.1285	0	0	0	0
RFX1	ENCSR968GIB	100	PAIRED	20199	20777	0.6158	0.4447	0.2846	0.1804	0.2737	0.0111	0	0
ZNF766	ENCSR194IJN	50	SINGLE	5793	5995	0.6654	0.7314	0.2685	0.1645	0	0.0001	0	0
YBX1	ENCSR107RHZ	100	PAIRED	333	392	0.6426	0.5555	0.2857	0.1831	0	0	0	0
WHSC1	ENCSR000AVE	36	SINGLE	107934	111844	0.438	0.5574	0.2866	0.1841	0	0	0	0
JUND	ENCSR000DJX	36	SINGLE	38025	40768	0.5372	0.5657	0.2692	0.1671	0	0	0	0
STAT6	ENCSR338UQU	100	SINGLE	19353	19199	0.5551	0.4918	0.2934	0.1941	0.0497	0.0028	0	0
HSF4	ENCSR579XWM	100	PAIRED	7759	8200	0.6313	0.4712	0.2702	0.1715	0.2584	0.032	0	0
U2AF1	ENCSR690GUG	40	SINGLE	5003	5425	0.4163	0.5231	0.2847	0.1884	0.0066	0	0	0
USF2	ENCSR578KEN	75	SINGLE	10993	11575	0.5896	0.5468	0.2442	0.1489	0.0353	0	0	0
MTF1	ENCSR849LXI	100	PAIRED	1363	1666	0.6962	0.52	0.243	0.1482	0.123	0.0132	0	0
CUX1	ENCSR178NTX	50	SINGLE	1294	1410	0.714	0.6582	0.2405	0.1468	0	0	0	0
SMAD3	ENCSR376XAV	101	PAIRED	3448	3626	0.6107	0.469	0.2628	0.1693	0.2164	0.0133	0	0.0002
SNIP1	ENCSR654CQU	100	PAIRED	699	738	0.5593	0.6041	0.2916	0.1988	0	0	0	0.01
IRF9	ENCSR926KTP	100	PAIRED	7637	7933	0.7203	0.4903	0.2644	0.1716	0.2837	0.014	0	0
HDAC8	ENCSR835TCD	100	PAIRED	2082	2426	0.5312	0.2867	0.196	0.1037	0.4926	0.2406	0	0
CHD4	ENCSR000ATL	36	SINGLE	45425	46823	0.7431	0.6823	0.2296	0.1373	0.0414	0.0016	0.0004	0
YBX3	ENCSR567JEU	100	PAIRED	4573	4928	0.7421	0.7242	0.2661	0.174	0.0623	0.0069	0	0.0006
CREB1	ENCSR471WXT	100	SINGLE	3738	3919	0.2685	0.3285	0.2761	0.1843	0	0	0	0
ZNF318	ENCSR352BJL	100	PAIRED	2640	2761	0.6287	0.5769	0.2692	0.1787	0.023	0.0011	0	0
ARHGAP35	ENCSR571BUF	100	PAIRED	1787	1913	0.6424	0.6056	0.2746	0.1852	0.007	0.0011	0	0.0016
NR0B1	ENCSR764YDL	100	PAIRED	246	311	0.5731	0.5131	0.2763	0.1869	0.1973	0.0813	0.0131	0.0121
SAFB2	ENCSR724GSW	40	SINGLE	37	135	0.2432	0.4693	0.2244	0.1351	0.0102	0	0	0
ADNP	ENCSR440VKE	50	SINGLE	5504	5870	0.9683	0.9528	0.2202	0.1319	0	0	0	0
SETDB1	ENCSR000EWI	32	SINGLE	20784	22014	0.476	0.5121	0.2692	0.1809	0.0003	0	0.0003	0
SREBF1	ENCSR815ZDS	36	SINGLE	10776	11136	0.286	0.4651	0.2312	0.1437	0.0008	0	0.0017	0
NCOA4	ENCSR119ULQ	100	PAIRED	3217	3595	0.7391	0.6492	0.2511	0.1638	0.09	0.0105	0	0.0009
HNRNPLL	ENCSR112RNT	40	SINGLE	15128	16404	0.487	0.581	0.2761	0.1909	0.0204	0	0.0005	0
BCLAF1	ENCSR792IYC	100	PAIRED	1120	1231	0.7794	0.4049	0.2396	0.1544	0.1818	0.0142	0	0.0017
TCF7	ENCSR863KUB	50	SINGLE	1215	1361	0.4032	0.4162	0.2756	0.1909	0	0	0	0
GATAD2A	ENCSR160QYK	100	PAIRED	14945	15614	0.5156	0.3684	0.2401	0.1559	0.3595	0.0161	0	0
TAF9B	ENCSR100UQX	100	PAIRED	10644	10998	0.5193	0.5481	0.2765	0.1925	0.1506	0.0032	0	0
PRMT5	ENCSR625ZVM	50	SINGLE	581	750	0.2822	0.3626	0.1968	0.1135	0.0103	0	0	0
RCOR1	ENCSR000EGC	36	SINGLE	16232	17409	0.4667	0.4698	0.2349	0.1522	0	0	0	0
DEAF1	ENCSR387SYS	50	SINGLE	4124	4424	0.3212	0.4136	0.2382	0.1556	0.0078	0	0	0
ZBTB8A	ENCSR283ZNI	100	PAIRED	201	267	0.6069	0.5466	0.2666	0.184	0.2266	0.0646	0	0.0099
RBM14	ENCSR423FCW	40	SINGLE	443	648	0.3115	0.5265	0.3141	0.2325	0	0.0022	0	0
HEY1	ENCSR405KTQ	100	PAIRED	140	199	0.7571	0.5322	0.2096	0.1285	0.0967	0.0214	0	0
NR2C2	ENCSR516SWI	100	SINGLE	3492	3319	0.3711	0.4134	0.3073	0.2276	0.0367	0.0105	0.0043	0.0011
HDAC6	ENCSR000ATJ	36	SINGLE	14916	12218	0.2993	0.3697	0.2413	0.1623	0.0044	0	0	0
ZNF384	ENCSR000EFP	36	SINGLE	32962	35284	0.7261	0.8096	0.2341	0.1607	0	0	0	0
NFYB	ENCSR000EGQ	34	SINGLE	9144	9530	0.6938	0.8376	0.2207	0.1478	0.0021	0.0001	0	0
TAF7	ENCSR671GFC	100	PAIRED	10240	10577	0.5395	0.3994	0.2544	0.1823	0.2773	0.0064	0	0
SRSF1	ENCSR832DMO	40	SINGLE	857	1072	0.2613	0.479	0.2622	0.1925	0.0209	0	0	0
VEZF1	ENCSR189YMA	50	SINGLE	5835	6011	0.5869	0.4905	0.25	0.1813	0	0.0001	0	0
THAP12	ENCSR415NNQ	100	PAIRED	42989	46363	0.4567	0.4347	0.2451	0.1783	0.0328	0.0024	0	0.0002
PHF20	ENCSR594SMP	100	PAIRED	15589	16158	0.5417	0.3633	0.2338	0.1685	0.376	0.022	0	0
ZNF561	ENCSR350GZC	101	PAIRED	2340	2557	0.629	0.4711	0.231	0.1662	0.2492	0.0038	0	0.0025
RHOXF2B	ENCSR551KXD	100	PAIRED	2861	3183	0.5414	0.4334	0.2351	0.1705	0.1841	0.0066	0	0.0003
TBL1XR1	ENCSR000EGA	36	SINGLE	5829	5817	0.3424	0.3913	0.2274	0.1631	0	0	0.0033	0
ZNF280A	ENCSR370NFS	100	PAIRED	1272	1412	0.9033	0.8598	0.2484	0.1847	0	0	0	0
MEF2D	ENCSR647ZXA	100	PAIRED	6648	6807	0.7305	0.5154	0.2164	0.1532	0.2835	0.0139	0	0.0001
KDM4B	ENCSR660RNO	100	PAIRED	485	684	0.6329	0.6291	0.2206	0.1587	0.1079	0.0226	0	0
GATA1	ENCSR000EFT	36	SINGLE	6372	6699	0.5015	0.8171	0.2313	0.1702	0.0016	0	0	0
ATF2	ENCSR014ARU	100	SINGLE	102	105	0.3235	0.5	0.1666	0.1078	0	0	0	0
ZNF668	ENCSR682AAS	100	PAIRED	4339	4986	0.7135	0.6251	0.2225	0.1638	0.0307	0.0029	0	0
ETS2	ENCSR596IKD	100	PAIRED	708	978	0.2387	0.2253	0.1111	0.055	0.6063	0.5098	0	0
TBPL1	ENCSR783EPA	101	PAIRED	8080	8389	0.4259	0.3523	0.2332	0.1771	0.3389	0.0652	0	0.0001
BACH1	ENCSR740NPG	50	SINGLE	5077	5350	0.7277	0.6757	0.2301	0.1745	0	0	0	0
TAF15	ENCSR047LSJ	40	SINGLE	271	417	0.3357	0.6318	0.2472	0.1918	0	0.0036	0	0
ZNF253	ENCSR271RRH	100	PAIRED	2165	2615	0.4914	0.365	0.2205	0.1658	0.3288	0.1011	0	0.0018
ZNF589	ENCSR603XLW	50	SINGLE	2917	2931	0.6695	0.6242	0.2229	0.1686	0	0.0003	0	0
E2F3	ENCSR036QIR	100	PAIRED	3363	3603	0.4936	0.2965	0.2302	0.1769	0.3564	0.0193	0	0.0002
ZNF146	ENCSR713IFY	50	SINGLE	23493	24413	0.9835	0.968	0.2501	0.198	0	0	0	0
CREB3	ENCSR093FKD	100	PAIRED	5371	5539	0.6944	0.3971	0.1962	0.1459	0.4065	0.0508	0	0
GTF2F1	ENCSR377BLZ	40	SINGLE	24047	32324	0.3214	0.3124	0.223	0.1731	0.0042	0.0003	0	0
TRIP13	ENCSR154EIH	100	PAIRED	263	284	0.6197	0.6	0.24	0.1901	0.08	0	0	0.0038
ZNF740	ENCSR737UST	50	SINGLE	5343	5575	0.5485	0.5722	0.2228	0.174	0.003	0	0	0
DIDO1	ENCSR167JBG	100	PAIRED	3299	3445	0.5801	0.401	0.2032	0.1545	0.2582	0.0224	0	0.0003
ZC3H11A	ENCSR000EFR	36	SINGLE	1436	1580	0.2722	0.3958	0.2113	0.1629	0	0	0.0029	0
RBM39	ENCSR764OXF	40	SINGLE	2443	2705	0.4514	0.5081	0.1967	0.1485	0.0036	0.0004	0	0
MEF2A	ENCSR000BNV	36	SINGLE	1125	1201	0.4515	0.5555	0.2345	0.1884	0	0	0	0
HINFP	ENCSR619GFP	100	PAIRED	2969	3083	0.6988	0.4715	0.1788	0.133	0.2601	0.003	0	0
ZNF584	ENCSR149ZBI	50	SINGLE	1649	1731	0.7289	0.5648	0.2061	0.1613	0	0	0	0
ZNF319	ENCSR231PDA	100	PAIRED	3365	3523	0.8653	0.4186	0.2151	0.1711	0.2906	0.0089	0	0.0005
REST	ENCSR054JMQ	101	PAIRED	7533	8266	0.4974	0.3701	0.2128	0.1709	0.2143	0.0908	0.0015	0.0001
RREB1	ENCSR250WFW	100	PAIRED	3125	3535	0.5084	0.2919	0.1917	0.151	0.3834	0.0636	0	0
TCF7L2	ENCSR888XZK	36	SINGLE	3952	4305	0.3076	0.5222	0.1932	0.153	0.0021	0	0	0
NR2F6	ENCSR128KLX	101	PAIRED	873	1060	0.3619	0.2948	0.1513	0.1122	0.4741	0.3505	0	0.0034
CEBPZ	ENCSR618GDK	36	SINGLE	1903	2168	0.4923	0.6256	0.1948	0.1565	0	0	0	0
BMI1	ENCSR782WRO	36	SINGLE	1807	1947	0.2905	0.4786	0.1706	0.1339	0	0	0	0
FOSL1	ENCSR239ZLZ	50	SINGLE	528	567	0.5757	0.7209	0.186	0.1496	0	0	0	0
ZNF212	ENCSR002ZGC	101	PAIRED	537	608	0.6182	0.3157	0.1684	0.1322	0.4421	0.1769	0	0
RBM25	ENCSR791OZM	40	SINGLE	69080	101417	0.9266	0.9202	0.1881	0.1534	0.0002	0.0001	0	0
RLF	ENCSR718SDE	100	PAIRED	9633	10097	0.5057	0.3884	0.2068	0.1722	0.3525	0.0371	0	0
ZNF699	ENCSR303SHG	100	PAIRED	589	994	0.3395	0.204	0.0852	0.0509	0.6165	0.4923	0	0
PCBP2	ENCSR603REQ	40	SINGLE	3570	4524	0.8535	0.7041	0.2232	0.1896	0.0616	0.0002	0.0023	0.0011
BDP1	ENCSR000DOK	27	SINGLE	447	623	0.8836	0.3989	0.1311	0.0984	0.2021	0.0357	0	0
DDIT3	ENCSR387BVC	101	PAIRED	1625	1774	0.4584	0.2792	0.1846	0.152	0.4909	0.1778	0	0.0006
SIRT6	ENCSR000DOH	34	SINGLE	379	415	0.4722	0.5576	0.173	0.1424	0.0192	0	0	0
RFX5	ENCSR000EGO	36	SINGLE	562	592	0.475	0.4545	0.1818	0.1512	0	0.0017	0	0
ZNF84	ENCSR376UMR	101	PAIRED	1680	1843	0.5267	0.4427	0.2395	0.2101	0.1614	0.0184	0	0.0005
SREBF2	ENCSR150QDE	100	SINGLE	29	60	0.2068	0.4571	0.2	0.1724	0.2	0	0	0
XRCC4	ENCSR000FAC	34	SINGLE	70	116	0.6	0.4225	0.0985	0.0714	0.0704	0.0285	0	0
TEAD2	ENCSR635GTR	100	PAIRED	1285	1377	0.6964	0.402	0.1443	0.1182	0.2783	0.0124	0	0
MLX	ENCSR873LYH	101	PAIRED	501	560	0.3153	0.2616	0.1495	0.1237	0.4859	0.3473	0	0
TFE3	ENCSR953KEY	151	PAIRED	8460	8887	0.6743	0.5366	0.1865	0.1615	0.2955	0.0257	0.002	0
HNRNPK	ENCSR014RCS	40	SINGLE	3833	3847	0.8019	0.6634	0.2227	0.198	0.0016	0.0002	0.0032	0.0015
RBM22	ENCSR848AOP	40	SINGLE	36692	66521	0.4479	0.4458	0.2795	0.2561	0.0002	0.0001	0	0
ZBTB11	ENCSR468DVP	101	PAIRED	6019	6505	0.6441	0.2913	0.1779	0.1565	0.5039	0.1141	0	0
NCOA6	ENCSR168CEE	100	PAIRED	2639	2876	0.4183	0.2919	0.1897	0.1701	0.4635	0.0443	0	0
FOXA3	ENCSR231ZVN	101	PAIRED	5719	5894	0.6438	0.5112	0.2062	0.1869	0.3094	0.0326	0	0.0001
MYC	ENCSR744JJU	100	PAIRED	1020	1270	0.4019	0.2354	0.1262	0.1078	0.5904	0.3205	0	0.0009
COPS2	ENCSR130HEG	100	PAIRED	637	1073	0.2794	0.1716	0.0429	0.0251	0.6845	0.4097	0	0
JUNB	ENCSR525VAT	101	PAIRED	1152	1343	0.4036	0.3577	0.1743	0.1571	0.3394	0.0789	0	0.0008
RBPJ	ENCSR740XMB	100	PAIRED	1809	2253	0.4289	0.2725	0.1643	0.1564	0.4669	0.1442	0	0.0005
ZNF215	ENCSR699RWG	100	PAIRED	4116	4334	0.7619	0.3153	0.1618	0.1542	0.4647	0.0269	0	0
PPARD	ENCSR576AMK	100	PAIRED	199	362	0.6733	0.3742	0.092	0.0854	0.411	0.1708	0	0
ZNF778	ENCSR110JLQ	101	PAIRED	232	476	0.1637	0.0384	0.0192	0.0129	0.8038	0.6034	0	0
HMG20B	ENCSR034GHQ	100	PAIRED	537	780	0.2662	0.1872	0.0823	0.0763	0.6029	0.432	0	0.0018
CHAMP1	ENCSR065XVO	100	PAIRED	2339	2473	0.8764	0.7676	0.2394	0.2338	0.0352	0.0025	0	0.0004
ZNF77	ENCSR844MAB	100	PAIRED	338	456	0.3964	0.1925	0.1111	0.1065	0.5629	0.1272	0	0.0029
ZNF41	ENCSR235PYI	100	PAIRED	5783	6099	0.6002	0.3179	0.1754	0.1708	0.4188	0.037	0	0.0001
CEBPG	ENCSR490LWA	100	PAIRED	20883	21364	0.6935	0.345	0.1775	0.1731	0.4958	0.0612	0	0
ZNF655	ENCSR568YNC	100	PAIRED	1160	1508	0.406	0.2853	0.1512	0.1482	0.4536	0.2094	0	0.0034
PHB	ENCSR650AWW	100	PAIRED	347	479	0.3948	0.2818	0.161	0.1585	0.4093	0.1902	0	0.0028
IRF1	ENCSR854MCV	100	PAIRED	3672	3849	0.7538	0.3755	0.1441	0.1427	0.5021	0.1132	0	0
ZNF830	ENCSR582EIB	100	PAIRED	542	727	0.4095	0.2878	0.156	0.1549	0.3024	0.0904	0	0.0018
ELK1	ENCSR392JVX	100	SINGLE	7	11	0.5714	0.25	0	0	0	0	0	0
ZNF717	ENCSR987KYK	100	PAIRED	345	460	0.4579	0.24	0.144	0.1449	0.528	0.1101	0	0.0028
HIVEP1	ENCSR947PJZ	100	PAIRED	2266	2756	0.5423	0.2536	0.1286	0.1297	0.4945	0.1323	0	0
ZNF695	ENCSR187RGF	101	PAIRED	1116	1584	0.5546	0.2894	0.1396	0.1415	0.508	0.1648	0	0.0017
CGGBP1	ENCSR763FNU	100	PAIRED	1419	1730	0.4052	0.1712	0.0948	0.0986	0.5596	0.3777	0.003	0.0049
ZFPM2	ENCSR906CWK	100	PAIRED	444	690	0.4009	0.114	0.0912	0.0968	0.5931	0.1576	0	0.0022
CAMTA2	ENCSR336GFK	100	PAIRED	532	705	0.3721	0.1632	0.0918	0.0977	0.6275	0.2913	0	0.0056
ETV1	ENCSR277DMR	100	PAIRED	13760	14586	0.4686	0.4023	0.1872	0.1933	0.1845	0.0662	0	0
NFIX	ENCSR574VJG	100	PAIRED	6102	6613	0.647	0.4097	0.1729	0.1794	0.3703	0.0088	0	0
ESRRB	ENCSR264LYE	100	PAIRED	470	661	0.3425	0.1581	0.079	0.0872	0.6976	0.3936	0	0.0021
ELK3	ENCSR972CVS	101	PAIRED	1380	1725	0.5253	0.258	0.1315	0.1398	0.5086	0.1681	0	0.0007
NELFE	ENCSR000DOF	34	SINGLE	78	117	0.282	0.3255	0.2093	0.2179	0.0232	0.0128	0	0
TSC22D4	ENCSR787RVK	100	PAIRED	867	1019	0.6124	0.3944	0.15	0.1591	0.2666	0.0288	0	0
ZNF347	ENCSR590FLL	101	PAIRED	612	1013	0.2549	0.0797	0.0478	0.0571	0.8041	0.6127	0	0.0016
PRPF4	ENCSR220YXI	40	SINGLE	3342	4560	0.3839	0.3127	0.197	0.2067	0.3432	0.0065	0	0
MYNN	ENCSR992KLV	75	SINGLE	480	828	0.325	0.4083	0.1166	0.127	0.0861	0.0062	0	0
ZNF408	ENCSR758PLU	100	PAIRED	901	1292	0.2863	0.2102	0.0827	0.0932	0.6286	0.4994	0	0
BRD4	ENCSR583ACG	76	SINGLE	23311	25834	0.5787	0.3567	0.1614	0.1726	0.3188	0.0479	0	0
TCFL5	ENCSR844JVU	100	PAIRED	5005	5288	0.6281	0.336	0.1525	0.1638	0.4659	0.0119	0	0
SLC30A9	ENCSR922YDT	100	PAIRED	1757	2100	0.3431	0.1953	0.0767	0.0882	0.5744	0.4746	0	0.0005
CCAR2	ENCSR598GER	40	SINGLE	130	251	0.5769	0.6299	0.1338	0.1461	0.0314	0.0153	0.0078	0
THAP7	ENCSR193ZLW	100	PAIRED	1177	1396	0.4231	0.2128	0.1526	0.1665	0.4779	0.1563	0	0.0016
BRF1	ENCSR000DOJ	27	SINGLE	173	246	0.919	0.7123	0.1232	0.1387	0	0	0	0
TCF15	ENCSR567NTZ	100	PAIRED	560	755	0.6017	0.3235	0.1127	0.1285	0.4362	0.1267	0	0.0017
CREB5	ENCSR935PEA	100	PAIRED	1024	1256	0.3662	0.1796	0.061	0.0771	0.6983	0.4443	0	0.0029
KAT2B	ENCSR000ATZ	36	SINGLE	1620	1826	0.2561	0.4143	0.1498	0.1691	0.0311	0.0024	0	0
ZNF518B	ENCSR597CHL	100	PAIRED	671	843	0.3636	0.2251	0.0865	0.1058	0.6406	0.3815	0	0.0014
PATZ1	ENCSR549PVK	100	PAIRED	758	1025	0.4379	0.1802	0.0782	0.0976	0.6734	0.3153	0	0.0026
KLF13	ENCSR608HVP	100	PAIRED	1424	1638	0.3918	0.217	0.1046	0.1242	0.5193	0.1889	0	0
RUNX1	ENCSR414TYY	100	PAIRED	718	853	0.4136	0.3943	0.1478	0.1685	0.2394	0.0153	0	0
PHF21A	ENCSR119VCX	100	PAIRED	1796	2275	0.5183	0.229	0.1115	0.1325	0.6055	0.2032	0	0.0016
FOXA1	ENCSR819LHG	100	PAIRED	999	1222	0.4284	0.25	0.0795	0.1021	0.5909	0.2562	0	0
E2F7	ENCSR171CAY	100	PAIRED	1458	1649	0.3847	0.2394	0.1314	0.1556	0.4976	0.0521	0	0
HOXB6	ENCSR861UWB	100	PAIRED	625	786	0.6384	0.3793	0.2011	0.2256	0.2816	0.024	0	0.0048
RELA	ENCSR772EEN	100	PAIRED	1800	1964	0.6366	0.2009	0.0841	0.1088	0.6728	0.2183	0	0
FOXO4	ENCSR426PTT	101	PAIRED	1048	1314	0.5954	0.3255	0.1362	0.1612	0.4186	0.1106	0	0
MED1	ENCSR269BSA	100	SINGLE	67	118	0.4925	0.4406	0.2881	0.3134	0.0338	0	0	0
ZMIZ1	ENCSR907JPB	36	SINGLE	1383	1493	0.3521	0.4142	0.1213	0.1467	0.0083	0	0	0
RBM15	ENCSR850WUE	40	SINGLE	35	108	0.2285	0.6621	0.2027	0.2285	0	0.0285	0	0
ARID3B	ENCSR360UHC	100	PAIRED	445	614	0.4426	0.3386	0.1587	0.1865	0.2962	0.0853	0	0
DLX4	ENCSR017EJY	100	PAIRED	440	672	0.4	0.1807	0.0923	0.1204	0.5943	0.1886	0	0.0022
ZNF3	ENCSR934RJP	100	PAIRED	702	1151	0.4102	0.0993	0.0486	0.0769	0.7632	0.3575	0	0.0014
ZNF57	ENCSR918EFA	101	PAIRED	695	981	0.4992	0.1601	0.1241	0.1525	0.5196	0.1453	0.0032	0.0014
HNRNPUL1	ENCSR296MXW	40	SINGLE	460	623	0.5521	0.5297	0.1488	0.1782	0.0416	0	0	0
ZNF311	ENCSR388ZRV	100	PAIRED	3664	3942	0.7434	0.2533	0.13	0.1599	0.56	0.0308	0	0
ZNF785	ENCSR222TVA	100	PAIRED	291	522	0.2783	0.0693	0.0244	0.0549	0.7755	0.3608	0	0
ARID4B	ENCSR676KDJ	100	PAIRED	1037	1302	0.4117	0.1985	0.0541	0.0848	0.5234	0.3326	0	0.0009
ZNF76	ENCSR257AFV	100	PAIRED	1006	1339	0.5487	0.1892	0.0875	0.1182	0.579	0.1192	0	0.0009
KDM2B	ENCSR620MHD	100	PAIRED	657	1021	0.35	0.2156	0.0916	0.1248	0.4824	0.0776	0	0.0015
ZNF764	ENCSR023OOE	100	PAIRED	682	1004	0.4868	0.1495	0.1202	0.1539	0.5571	0.1217	0	0.0014
ZKSCAN3	ENCSR199HGP	100	PAIRED	949	1182	0.5964	0.3076	0.1052	0.139	0.4534	0.0621	0	0
E4F1	ENCSR003GUC	100	PAIRED	815	1094	0.2368	0.11	0.0355	0.0699	0.7572	0.5092	0	0.0024
ZNF586	ENCSR236JZN	101	PAIRED	508	724	0.5019	0.1379	0.0905	0.1259	0.6293	0.2755	0	0.0019
ID3	ENCSR125YGM	100	PAIRED	358	715	0.5446	0.1551	0.0332	0.0698	0.6509	0.2374	0	0
ZNF140	ENCSR377HQG	100	PAIRED	771	1191	0.3631	0.1167	0.0274	0.0648	0.7322	0.3826	0	0
ZNF134	ENCSR553NTC	100	PAIRED	2550	2731	0.7858	0.2284	0.1065	0.1439	0.5888	0.0349	0	0
GTF2A2	ENCSR801RPW	100	PAIRED	3604	3905	0.5041	0.1662	0.0606	0.0982	0.7572	0.379	0	0
ZNF398	ENCSR948JND	100	PAIRED	856	1300	0.6308	0.2118	0.0762	0.1144	0.6186	0.2032	0	0
RNF219	ENCSR041QAZ	100	PAIRED	464	667	0.4482	0.1552	0.0456	0.084	0.6757	0.2801	0	0.0064
PTRF	ENCSR126FZN	100	PAIRED	1766	1936	0.7621	0.2892	0.0637	0.1041	0.5686	0.1166	0	0.0005
HOMEZ	ENCSR801JWB	100	PAIRED	419	620	0.5011	0.1712	0.0833	0.1241	0.5092	0.1312	0	0
STAT5B	ENCSR663NFC	100	PAIRED	200	310	0.64	0.241	0.0535	0.095	0.4732	0.065	0	0
ZNF280B	ENCSR775FSH	100	PAIRED	2026	2483	0.6066	0.2846	0.1043	0.147	0.518	0.2156	0	0
RFX7	ENCSR444MSK	100	PAIRED	590	844	0.4915	0.151	0.0683	0.1118	0.6582	0.2033	0	0.005
CLOCK	ENCSR228OQM	100	PAIRED	564	839	0.2411	0.14	0.01	0.0549	0.7333	0.5248	0	0
ZNF700	ENCSR959BQO	100	PAIRED	472	607	0.7796	0.2949	0.1366	0.1822	0.3381	0.0084	0	0
TBX18	ENCSR385IUC	100	PAIRED	1274	1619	0.5706	0.1643	0.0849	0.131	0.5698	0.08	0	0
IFI16	ENCSR208VNN	100	PAIRED	404	537	0.6287	0.2785	0.05	0.0965	0.3857	0.099	0	0
ZNF449	ENCSR659YWQ	100	PAIRED	1270	1460	0.6417	0.199	0.0597	0.107	0.4726	0.1173	0	0.0007
SMARCB1	ENCSR000EHN	28	SINGLE	58	68	0.362	0.7058	0.1764	0.2241	0	0	0	0
EWSR1	ENCSR142YYA	100	PAIRED	3613	3864	0.763	0.2604	0.1215	0.1704	0.5243	0.0495	0	0
ZBTB34	ENCSR567QAD	100	PAIRED	294	510	0.6598	0.1872	0.0456	0.0952	0.589	0.1156	0	0.0034
SNAPC5	ENCSR008DOU	100	PAIRED	347	613	0.4985	0.174	0.074	0.1268	0.6592	0.2132	0	0
PHTF2	ENCSR059BWP	100	PAIRED	395	597	0.4582	0.2036	0.0542	0.1088	0.6244	0.2683	0	0.005
ZNF780A	ENCSR214PDW	100	PAIRED	368	627	0.4021	0.1254	0.0752	0.1304	0.6415	0.2445	0.0071	0.0027
NFE2L1	ENCSR632SHZ	100	PAIRED	5170	5525	0.6725	0.2944	0.1142	0.1715	0.5482	0.0605	0	0
PTTG1	ENCSR314BBS	100	PAIRED	1839	1946	0.8477	0.2439	0.0731	0.1305	0.5934	0.0494	0	0
ZNF397	ENCSR508EEX	100	PAIRED	480	717	0.6645	0.1485	0.0923	0.15	0.5702	0.0541	0	0.0041
ZNF174	ENCSR056VYW	100	PAIRED	287	516	0.4459	0.055	0.0127	0.0731	0.8008	0.3588	0	0
ZNF696	ENCSR276RQG	100	PAIRED	698	909	0.5759	0.2761	0.1129	0.1733	0.502	0.1547	0	0.0014
ILK	ENCSR648INT	100	PAIRED	1765	2391	0.5552	0.1413	0.036	0.0968	0.7398	0.3087	0	0
KDM5B	ENCSR000AQA	36	SINGLE	266	252	0.4661	0.6309	0.1309	0.1917	0	0	0	0
ZNF354B	ENCSR044IXA	100	PAIRED	984	1164	0.8384	0.3655	0.0913	0.1534	0.4193	0.0182	0	0.001
BCL6	ENCSR802AHH	100	PAIRED	659	797	0.6995	0.1948	0.0519	0.1183	0.6038	0.0834	0	0
ZNF79	ENCSR995FUM	100	PAIRED	1211	1485	0.6911	0.1206	0.0517	0.1205	0.7103	0.0767	0	0
XRCC3	ENCSR997NGQ	100	PAIRED	1317	1548	0.6362	0.3962	0.1148	0.1837	0.4703	0.0918	0	0
ZNF444	ENCSR164RIC	100	PAIRED	776	999	0.6456	0.1724	0.0905	0.1597	0.6379	0.0605	0	0.0012
CHCHD3	ENCSR775NLJ	100	PAIRED	324	479	0.5277	0.2424	0.0909	0.1604	0.4969	0.0802	0.0121	0.0154
HNRNPH1	ENCSR581CVA	40	SINGLE	99	120	0.4545	0.4848	0.2424	0.3131	0	0.0101	0	0
MXD1	ENCSR026RAK	100	PAIRED	521	867	0.4261	0.1756	0.0481	0.1209	0.5524	0.0767	0	0.0019
ZNF277	ENCSR358PJI	100	PAIRED	539	1127	0.3692	0.1112	0.0605	0.1335	0.6072	0.1298	0	0
ZNF445	ENCSR883UGG	100	PAIRED	944	1327	0.6408	0.1532	0.0829	0.1578	0.6884	0.143	0	0.001
ZNF707	ENCSR077TKJ	100	PAIRED	1322	1642	0.7639	0.157	0.0785	0.1558	0.5347	0.0461	0	0.0007
POLR3G	ENCSR000EHQ	27	SINGLE	22	32	0.5454	0.647	0.0588	0.1363	0	0.0454	0	0
KLF6	ENCSR297CGF	100	PAIRED	780	999	0.8256	0.2421	0.0403	0.1192	0.5874	0.0397	0	0.0012
SMAD2	ENCSR189PYJ	36	SINGLE	42	126	0.3095	0.2857	0.0612	0.1428	0.0306	0	0	0
TSHZ1	ENCSR958JPH	100	PAIRED	584	828	0.815	0.191	0.0365	0.1181	0.5243	0.0325	0	0
ELF2	ENCSR594HXD	100	PAIRED	1480	1731	0.3108	0.1333	0.0736	0.156	0.7017	0.1864	0	0.0006
KLF10	ENCSR121SPB	100	PAIRED	404	621	0.4702	0.2112	0.0689	0.1608	0.5991	0.1856	0	0.0024
ZFP1	ENCSR617POJ	151	PAIRED	1956	2225	0.4831	0.1044	0.0189	0.1114	0.7911	0.3895	0	0.0035
FOXJ3	ENCSR056VMR	100	SINGLE	282	320	0.2695	0.3584	0.0566	0.156	0.415	0.0035	0	0
ZNF551	ENCSR451UQX	100	PAIRED	348	553	0.5948	0.125	0.0787	0.1839	0.7129	0.1235	0	0.0028
ZNF324	ENCSR712KVZ	100	PAIRED	2661	2876	0.8752	0.2531	0.0759	0.1878	0.6286	0.0293	0	0.0003
ZNF354C	ENCSR506SSQ	100	PAIRED	1621	2167	0.5595	0.2145	0.0939	0.2115	0.5106	0.0468	0	0.0006
RBM17	ENCSR836COE	40	SINGLE	18	40	0.1666	0.4166	0.0833	0.2222	0	0.0555	0	0
SRSF7	ENCSR222MYK	40	SINGLE	22	61	0.4545	0.5526	0.1052	0.2727	0	0.0454	0	0
POU5F1	ENCSR364SNE	36	SINGLE	492	559	0.2317	0.4235	0.0352	0.2052	0	0.002	0	0
SRSF9	ENCSR814AJH	40	SINGLE	42	116	0.7142	0.6419	0.037	0.2142	0.0123	0	0	0
TFAM	ENCSR674WPB	100	PAIRED	64	85	0.5	0.375	0.025	0.25	0.05	0.0312	0	0
JUN	ENCSR000EZW	27	SINGLE	5312	5622	0.607	0.5109	0.2258	0.1699	0.0175	0.0001	0.0029	0
MITF	ENCSR797SWM	100	PAIRED	34978	35526	0.7292	0.7555	0.3553	0.175	0.0118	0.0004	0	0
NFIC	ENCSR796ITY	100	PAIRED	93779	95727	0.6949	0.7001	0.4091	0.181	0.0076	0	0.0004	0
ZBTB1	ENCSR166BAY	100	SINGLE	2940	3117	0.5018	0.3993	0.3382	0.2044	0	0	0	0
ZFP30	ENCSR279OXE	100	PAIRED	328	406	0.5443	0.7408	0.2278	0.2195	0.2025	0.0274	0	0
ZNF165	ENCSR172XJS	100	PAIRED	9345	9822	0.4773	0.5416	0.343	0.1671	0.0871	0.0022	0	0
ZNF507	ENCSR598TIR	100	PAIRED	9817	10567	0.4289	0.845	0.0932	0.1649	0.5034	0.1156	0	0

## Sheet: Supplemental_Table_S7
Supplemental_Table_S7: Fraction of overlap between Allo-only peaks and UMR-derived peaks at transposable element families. The table is broken down according to transcription factors. Only families with at least a 5% overlap are presented.
Allo	UMR	Family	TF
0.5146	0.4607	Alu	ADNP
0.0584	0.0425	ERV1	ADNP
0.0629	0.0619	ERVL	ADNP
0.1078	0.0988	L1	ADNP
0.1011	0.1186	L2	ADNP
0.391	0.547	MIR	ADNP
0.0471	0.051	hAT	ADNP
0.1223	0.2276	Alu	AFF1
0.0368	0.0569	ERV1	AFF1
0.0541	0.055	ERVL	AFF1
0.4564	0.2327	L1	AFF1
0.0423	0.092	L2	AFF1
0.0501	0.1014	MIR	AFF1
0.0652	0.0617	Alu	AFF4
0.0869	0.0162	ERV1	AFF4
0.0792	0.0448	Alu	AGO1
0.0562	0.032	L1	AGO1
0.1338	0.0716	Alu	ARHGAP35
0.0985	0.0386	L1	ARHGAP35
0.2353	0.2938	Alu	ARID1B
0.085	0.0777	ERV1	ARID1B
0.0662	0.0837	ERVL	ARID1B
0.0375	0.054	ERVL-MaLR	ARID1B
0.1314	0.1137	L1	ARID1B
0.064	0.1146	L2	ARID1B
0.0629	0.1227	MIR	ARID1B
0.022	0.0512	hAT	ARID1B
0.1578	0.1221	Alu	ARID2
0.0818	0.0489	L1	ARID2
0.0175	0.0554	L2	ARID2
0.076	0.0658	MIR	ARID2
0.1313	0.0866	Alu	ARID3A
0.1994	0.0637	ERV1	ARID3A
0.0656	0.0676	ERVL	ARID3A
0.0707	0.0856	L1	ARID3A
0.0328	0.0765	L2	ARID3A
0.0555	0.0834	MIR	ARID3A
0.0582	0.0224	Alu	ARID3B
0.0317	0.1146	ERV1	ARID3B
0.0252	0.1215	ERV1	ARID4B
0.018	0.1012	L1	ARID4B
0.1909	0.2838	Alu	ARNT
0.0969	0.0976	ERV1	ARNT
0.0757	0.0818	ERVL	ARNT
0.0575	0.0515	ERVL-MaLR	ARNT
0.1393	0.1306	L1	ARNT
0.0818	0.1305	L2	ARNT
0.103	0.1471	MIR	ARNT
0.0575	0.069	hAT	ARNT
0.0424	0.0543	hAT-Charlie	ARNT
0.1825	0.1958	Alu	ASH1L
0.0546	0.1027	ERV1	ASH1L
0.0597	0.0428	ERVL	ASH1L
0.2167	0.128	L1	ASH1L
0.0409	0.0538	L2	ASH1L
0.0324	0.052	MIR	ASH1L
0.0625	0.0184	Alu	ATF1
0.2277	0.2793	Alu	ATF3
0.0514	0.0439	ERV1	ATF3
0.0873	0.1008	ERVL	ATF3
0.067	0.0711	ERVL-MaLR	ATF3
0.1263	0.1309	L1	ATF3
0.0795	0.1073	L2	ATF3
0.0748	0.1267	MIR	ATF3
0.039	0.0585	hAT	ATF3
0.2809	0.3273	Alu	ATF4
0.073	0.046	ERV1	ATF4
0.1084	0.0999	ERVL	ATF4
0.0774	0.0684	ERVL-MaLR	ATF4
0.1615	0.1872	L1	ATF4
0.0641	0.0993	L2	ATF4
0.0398	0.1154	MIR	ATF4
0.0287	0.0625	hAT	ATF4
0.0899	0.209	Alu	ATF7
0.0607	0.0601	ERV1	ATF7
0.0498	0.0802	ERVL	ATF7
0.0425	0.0564	ERVL-MaLR	ATF7
0.0814	0.0828	L1	ATF7
0.0315	0.1006	L2	ATF7
0.0267	0.1533	MIR	ATF7
0.0315	0.0531	hAT	ATF7
0.1361	0.1447	Alu	BACH1
0.1633	0.165	ERV1	BACH1
0.1311	0.1386	ERVL	BACH1
0.0866	0.0817	ERVL-MaLR	BACH1
0.1089	0.1406	L1	BACH1
0.099	0.113	L2	BACH1
0.1039	0.1463	MIR	BACH1
0.042	0.0787	hAT	BACH1
0.0297	0.0583	hAT-Charlie	BACH1
0.0389	0.0713	Alu	BCL6
0.0519	0.443	ERV1	BCL6
0.0259	0.1305	ERVL	BCL6
0.0259	0.05	L1	BCL6
0.0064	0.0546	L2	BCL6
0	0.0531	MIR	BCL6
0.0578	0.3017	Alu	BCLAF1
0.0082	0.0892	ERVL	BCLAF1
0	0.0723	ERVL-MaLR	BCLAF1
0.0495	0.1392	L1	BCLAF1
0.0247	0.141	L2	BCLAF1
0.0082	0.133	MIR	BCLAF1
0.0247	0.0857	hAT	BCLAF1
0.0247	0.066	hAT-Charlie	BCLAF1
0.407	0.515	Alu	BCOR
0.0398	0.0562	ERVL	BCOR
0.3352	0.2134	L1	BCOR
0.0573	0.1121	L2	BCOR
0.0876	0.2485	MIR	BCOR
0.0273	0.161	Alu	BDP1
0.2048	0.0719	Alu	BHLHE40
0.0874	0.0318	ERV1	BHLHE40
0.0817	0.0529	ERVL	BHLHE40
0.0545	0.0359	ERVL-MaLR	BHLHE40
0.03	0.0511	L2	BHLHE40
0.0272	0.0758	MIR	BHLHE40
0.09	0.0387	Alu	BMI1
0.1184	0.0747	ERV1	BMI1
0.0616	0.0431	L1	BMI1
0.1693	0.0869	Alu	BRCA1
0.0921	0.2023	Alu	BRD4
0.032	0.0624	ERV1	BRD4
0.0677	0.0803	L1	BRD4
0.0303	0.0674	L2	BRD4
0.0539	0.1145	MIR	BRD4
0.2096	0.2883	Alu	BRD9
0.0655	0.0783	ERV1	BRD9
0.1135	0.0578	ERVL	BRD9
0.0829	0.037	ERVL-MaLR	BRD9
0.131	0.105	L1	BRD9
0.0742	0.1108	L2	BRD9
0.0698	0.1794	MIR	BRD9
0.0218	0.0562	hAT	BRD9
0.0136	0.052	Alu	BRF1
0.1653	0.1807	Alu	C11orf30
0.0712	0.0573	ERV1	C11orf30
0.0826	0.0791	ERVL	C11orf30
0.0551	0.0523	ERVL-MaLR	C11orf30
0.2119	0.2198	L1	C11orf30
0.0674	0.0927	L2	C11orf30
0.0494	0.0991	MIR	C11orf30
0.0475	0.0619	hAT	C11orf30
0.0102	0.0563	Alu	CAMTA2
0.0102	0.0582	ERV1	CAMTA2
0.1442	0.1674	Alu	CBFA2T2
0.0939	0.1004	ERV1	CBFA2T2
0.1308	0.1318	ERVL	CBFA2T2
0.0771	0.0885	ERVL-MaLR	CBFA2T2
0.104	0.0836	L1	CBFA2T2
0.0536	0.1071	L2	CBFA2T2
0.0302	0.1219	MIR	CBFA2T2
0.208	0.0212	SVA	CBFA2T2
0.0268	0.05	hAT	CBFA2T2
0.1327	0.1881	Alu	CBFA2T3
0.1053	0.0934	ERV1	CBFA2T3
0.0779	0.1157	ERVL	CBFA2T3
0.049	0.0741	ERVL-MaLR	CBFA2T3
0.0995	0.102	L1	CBFA2T3
0.0591	0.114	L2	CBFA2T3
0.0346	0.1312	MIR	CBFA2T3
0.0995	0.0219	SVA	CBFA2T3
0.023	0.0644	hAT	CBFA2T3
0.0187	0.0509	hAT-Charlie	CBFA2T3
0.0822	0.0426	Alu	CBFB
0.0511	0.0202	L1	CBFB
0.04	0.0527	MIR	CBFB
0.2168	0.0995	Alu	CBX3
0.1176	0.0805	ERV1	CBX3
0.1375	0.1327	ERVL	CBX3
0.1234	0.1086	ERVL-MaLR	CBX3
0.1872	0.1487	L1	CBX3
0.03	0.0633	L2	CBX3
0.0407	0.1029	MIR	CBX3
0.3243	0.3074	Alu	CC2D1A
0.0761	0.0976	ERV1	CC2D1A
0.0909	0.0953	ERVL	CC2D1A
0.0687	0.0704	ERVL-MaLR	CC2D1A
0.1228	0.0857	L1	CC2D1A
0.0515	0.0735	L2	CC2D1A
0.0368	0.092	MIR	CC2D1A
0.0157	0.1538	Alu	CCAR2
0.0393	0.1076	L1	CCAR2
0.0639	0.0354	Alu	CCNT2
0.0814	0.0425	ERV1	CCNT2
0.0531	0.037	ERVL	CCNT2
0.1237	0.0999	Alu	CDC5L
0.0721	0.0269	ERV1	CDC5L
0.0618	0.0548	L1	CDC5L
0.5005	0.1699	Alu	CEBPB
0.0808	0.0498	ERV1	CEBPB
0.055	0.0713	ERVL	CEBPB
0.1176	0.1241	L1	CEBPB
0.0302	0.0633	L2	CEBPB
0.0353	0.0854	MIR	CEBPB
0.0311	0.0506	hAT	CEBPB
0.0804	0.2223	Alu	CEBPG
0.0184	0.0756	ERVL	CEBPG
0.0067	0.0519	ERVL-MaLR	CEBPG
0.1239	0.2331	L1	CEBPG
0.0217	0.0764	L2	CEBPG
0.0452	0.1154	MIR	CEBPG
0.0083	0.0641	hAT	CEBPG
0.0512	0.0982	ERV1	CEBPZ
0.1076	0.279	ERVL	CEBPZ
0.0948	0.2433	ERVL-MaLR	CEBPZ
0.0244	0.1346	Alu	CGGBP1
0.0183	0.1155	L1	CGGBP1
0.3873	0.4224	Alu	CHAMP1
0.1197	0.1175	ERV1	CHAMP1
0.1126	0.1872	ERVL	CHAMP1
0.0985	0.168	ERVL-MaLR	CHAMP1
0.2183	0.2454	L1	CHAMP1
0.0484	0.1203	Alu	CHCHD3
0.0857	0.0527	Alu	CHD2
0.0589	0.016	ERV1	CHD2
0.1839	0.1184	ERVL	CHD2
0.1767	0.113	ERVL-MaLR	CHD2
0.2588	0.2948	Alu	CHD4
0.0504	0.0463	ERV1	CHD4
0.041	0.0533	ERVL	CHD4
0.1702	0.1041	L1	CHD4
0.0608	0.1049	L2	CHD4
0.1296	0.2894	MIR	CHD4
0.0233	0.0975	ERV1	CLOCK
0.056	0.1878	Alu	CREB3
0.0654	0.2291	ERV1	CREB3
0.0981	0.1266	ERVL	CREB3
0.0794	0.0795	ERVL-MaLR	CREB3
0.042	0.0707	L1	CREB3
0.07	0.0981	L2	CREB3
0.0373	0.1377	MIR	CREB3
0.014	0.0554	hAT	CREB3
0.1185	0.144	Alu	CREB3L1
0.0681	0.0599	ERVL	CREB3L1
0.1103	0.0586	L1	CREB3L1
0.0324	0.0788	L2	CREB3L1
0.0405	0.1285	MIR	CREB3L1
0.0338	0.0546	Alu	CREB5
0.0338	0.1552	ERV1	CREB5
0.0101	0.0517	ERVL	CREB5
0.1388	0.0615	Alu	CREM
0.0578	0.0386	ERV1	CREM
0.0522	0.0606	ERVL	CREM
0.0647	0.0362	L1	CREM
0.0278	0.0582	MIR	CREM
0.2767	0.2389	Alu	CSDE1
0.1771	0.1491	L1	CSDE1
0.1039	0.0983	Alu	CTBP1
0.0561	0.0396	ERV1	CTBP1
0.087	0.0556	ERVL	CTBP1
0.0617	0.0334	ERVL-MaLR	CTBP1
0.0758	0.0416	L1	CTBP1
0.0533	0.0872	L2	CTBP1
0.0533	0.1155	MIR	CTBP1
0.0886	0.1081	Alu	CUX1
0.2531	0.3222	ERV1	CUX1
0.0696	0.1043	ERVL	CUX1
0.1012	0.1043	L1	CUX1
0.0379	0.0625	L2	CUX1
0.0443	0.0749	MIR	CUX1
0.1032	0.1524	Alu	DACH1
0.0597	0.0943	ERVL	DACH1
0.0896	0.1255	L1	DACH1
0.0217	0.0818	L2	DACH1
0.0461	0.1248	MIR	DACH1
0.045	0.0781	Alu	DDIT3
0.0225	0.0633	ERVL	DDIT3
0.0225	0.0646	L1	DDIT3
0.009	0.0566	MIR	DDIT3
0.2212	0.1929	Alu	DDX20
0.0796	0.1301	ERV1	DDX20
0.1238	0.0515	ERVL	DDX20
0.0707	0.0312	ERVL-MaLR	DDX20
0.0619	0.0561	L1	DDX20
0.0619	0.073	L2	DDX20
0.0707	0.0968	MIR	DDX20
0.0549	0.0489	Alu	DEAF1
0.0549	0.0939	Alu	DIDO1
0.0714	0.1291	ERV1	DIDO1
0.0329	0.0766	ERVL	DIDO1
0.0604	0.0475	L1	DIDO1
0.0274	0.0718	L2	DIDO1
0.0164	0.0636	MIR	DIDO1
0.0321	0.0772	Alu	DLX4
0.0185	0.0804	Alu	DMTF1
0.074	0.0288	ERV1	DMTF1
0.1707	0.1464	Alu	DNMT1
0.0731	0.0828	L1	DNMT1
0.0975	0.07	L2	DNMT1
0.0243	0.0509	hAT	DNMT1
0.0243	0.0509	hAT-Charlie	DNMT1
0.2717	0.3266	Alu	DPF2
0.0682	0.0773	ERV1	DPF2
0.0814	0.0864	ERVL	DPF2
0.0539	0.0578	ERVL-MaLR	DPF2
0.1342	0.1203	L1	DPF2
0.0748	0.1308	L2	DPF2
0.0583	0.1531	MIR	DPF2
0.0363	0.0621	hAT	DPF2
0.1012	0.1442	Alu	E2F1
0.0126	0.0545	MIR	E2F1
0.0252	0.1171	ERV1	E2F3
0.0544	0.0318	Alu	E2F4
0.0661	0.0119	ERV1	E2F4
0.1301	0.0994	Alu	E2F5
0.1414	0.144	ERV1	E2F5
0.0775	0.09	ERVL	E2F5
0.0513	0.0503	ERVL-MaLR	E2F5
0.07	0.0579	L1	E2F5
0.05	0.0632	L2	E2F5
0.0438	0.0801	MIR	E2F5
0.114	0.0399	Alu	E2F6
0.0652	0.0252	ERV1	E2F6
0.0422	0.061	Alu	E2F7
0.0093	0.0534	ERV1	E2F7
0.237	0.2431	Alu	E2F8
0.0577	0.0374	ERV1	E2F8
0.0516	0.0392	ERVL	E2F8
0.0759	0.0616	L1	E2F8
0.0455	0.0822	L2	E2F8
0.0607	0.0949	MIR	E2F8
0.1105	0.1899	Alu	EGR1
0.081	0.0655	L1	EGR1
0.0159	0.0646	L2	EGR1
0.0184	0.0769	MIR	EGR1
0.1498	0.1742	Alu	EHMT2
0.0778	0.068	ERV1	EHMT2
0.072	0.1095	ERVL	EHMT2
0.0518	0.0738	ERVL-MaLR	EHMT2
0.1095	0.101	L1	EHMT2
0.0806	0.1527	L2	EHMT2
0.0259	0.0921	MIR	EHMT2
0.1452	0.1685	Alu	ELF1
0.0502	0.0493	ERVL	ELF1
0.1005	0.06	L1	ELF1
0.0279	0.0659	L2	ELF1
0.0279	0.0973	MIR	ELF1
0.021	0.0722	ERV1	ELF2
0.0793	0.0142	Alu	ELF4
0.0857	0.1121	ERVL	ELF4
0.073	0.1038	ERVL-MaLR	ELF4
0.0198	0.1	Alu	ELK3
0.0521	0.2	ERV1	ELK3
0.0173	0.0659	ERVL	ELK3
0.0521	0.0528	L1	ELK3
0.0124	0.05	L2	ELK3
0.0272	0.0579	MIR	ELK3
0.1479	0.1909	Alu	EP400
0.0724	0.063	ERV1	EP400
0.0924	0.0595	ERVL	EP400
0.0677	0.0411	ERVL-MaLR	EP400
0.1864	0.1074	L1	EP400
0.0662	0.0816	L2	EP400
0.0493	0.1158	MIR	EP400
0.1244	0.121	Alu	ESRRA
0.08	0.0548	ERV1	ESRRA
0.0622	0.0573	ERVL	ESRRA
0.0755	0.0439	L1	ESRRA
0.0377	0.0916	L2	ESRRA
0.08	0.2663	MIR	ESRRA
0.0279	0.0744	Alu	ESRRB
0.0186	0.0744	ERV1	ESRRB
0.0507	0.0607	Alu	ETS2
0.0158	0.0663	ERV1	ETS2
0.0571	0.0423	L1	ETS2
0.0659	0.0807	Alu	ETV1
0.0646	0.0821	ERV1	ETV1
0.0446	0.0564	ERVL	ETV1
0.0759	0.0632	L1	ETV1
0.0406	0.05	L2	ETV1
0.0532	0.0704	MIR	ETV1
0.1368	0.1282	Alu	ETV5
0.0551	0.0435	ERV1	ETV5
0.0551	0.0321	L1	ETV5
0.0397	0.07	L2	ETV5
0.0463	0.1115	MIR	ETV5
0	0.1168	Alu	ETV6
0.1333	0	ERV1	ETV6
0	0.0649	MIR	ETV6
0.0763	0.3861	Alu	EWSR1
0.0138	0.1262	ERVL	EWSR1
0.0034	0.0941	ERVL-MaLR	EWSR1
0.0729	0.2192	L1	EWSR1
0.0069	0.1591	L2	EWSR1
0.0138	0.1502	MIR	EWSR1
0.0104	0.1212	hAT	EWSR1
0.0069	0.1057	hAT-Charlie	EWSR1
0.0649	0.0281	Alu	EZH2
0.1038	0.0281	L1	EZH2
0.0389	0.086	MIR	EZH2
0.0519	0.0118	TcMar	EZH2
0.2457	0.1125	Alu	FOS
0.0695	0.0411	ERV1	FOS
0.0664	0.0739	ERVL	FOS
0.0448	0.0739	L2	FOS
0.0278	0.0739	MIR	FOS
0.1395	0.1022	Alu	FOSL1
0.1627	0.0625	ERV1	FOSL1
0.1395	0.0738	ERVL	FOSL1
0.1162	0.0473	ERVL-MaLR	FOSL1
0.1395	0.053	L1	FOSL1
0.093	0.0833	L2	FOSL1
0.093	0.1136	MIR	FOSL1
0.0465	0.0587	TcMar	FOSL1
0.1098	0.1421	L1	FOXA1
0.0358	0.0765	Alu	FOXA3
0.0672	0.0813	ERV1	FOXA3
0.0582	0.0683	ERVL	FOXA3
0.2062	0.2138	L1	FOXA3
0.0448	0.0751	L2	FOXA3
0.0582	0.0825	MIR	FOXA3
0.1139	0.0746	Alu	FOXJ2
0.2025	0.0876	ERV1	FOXJ2
0.1265	0.065	ERVL	FOXJ2
0.0886	0.0356	ERVL-MaLR	FOXJ2
0.1139	0.0706	L1	FOXJ2
0	0.0627	MIR	FOXJ2
0.1132	0.039	Alu	FOXJ3
0.0943	0.0248	L1	FOXJ3
0.0743	0.0873	Alu	FOXK1
0.0578	0.0145	L1	FOXK1
0.1441	0.1689	Alu	FOXK2
0.0698	0.0605	ERV1	FOXK2
0.0445	0.0545	ERVL	FOXK2
0.1322	0.0995	L1	FOXK2
0.0728	0.0789	L2	FOXK2
0.0549	0.0736	MIR	FOXK2
0.1724	0.1577	Alu	FOXM1
0.1724	0.1338	ERV1	FOXM1
0.1379	0.0933	ERVL	FOXM1
0.0689	0.0493	ERVL-MaLR	FOXM1
0.1293	0.0765	L1	FOXM1
0.0344	0.0832	L2	FOXM1
0.0431	0.0969	MIR	FOXM1
0.0631	0.1202	Alu	FOXO4
0.0631	0.291	ERV1	FOXO4
0.0232	0.0849	ERVL	FOXO4
0.0099	0.0553	L2	FOXO4
0.0199	0.0572	MIR	FOXO4
0.0531	0.041	Alu	FOXP1
0.1639	0.0283	Alu	FOXP4
0.0507	0.0231	Alu	FUS
0.1371	0.1162	Alu	GABPA
0.1017	0.0626	ERV1	GABPA
0.0796	0.0628	ERVL	GABPA
0.0707	0.058	L1	GABPA
0.0486	0.0777	L2	GABPA
0.0353	0.1128	MIR	GABPA
0.1099	0.1602	Alu	GABPB1
0.1256	0.0553	ERV1	GABPB1
0.068	0.0637	ERVL	GABPB1
0.0837	0.0653	L1	GABPB1
0.0523	0.0862	L2	GABPB1
0.0418	0.1129	MIR	GABPB1
0.1456	0.0626	Alu	GATA1
0.3106	0.0621	ERV1	GATA1
0.131	0.0925	ERVL	GATA1
0.0695	0.0475	ERVL-MaLR	GATA1
0.0922	0.0558	L1	GATA1
0.0177	0.0932	L2	GATA1
0.0404	0.098	MIR	GATA1
0.0952	0.1076	Alu	GATA2
0.1015	0.097	ERV1	GATA2
0.1333	0.0885	ERVL	GATA2
0.0793	0.0494	ERVL-MaLR	GATA2
0.092	0.059	L1	GATA2
0.0698	0.0896	L2	GATA2
0.0634	0.0975	MIR	GATA2
0.0825	0.0876	Alu	GATAD2A
0.0254	0.0523	ERV1	GATAD2A
0.0825	0.0422	L1	GATAD2A
0.019	0.0643	L2	GATAD2A
0.0203	0.0778	MIR	GATAD2A
0.0595	0.0438	Alu	GATAD2B
0.0595	0.0263	ERV1	GATAD2B
0.0518	0.0215	ERVL	GATAD2B
0.0647	0.0239	L1	GATAD2B
0.0621	0.069	MIR	GATAD2B
0.1817	0.2224	Alu	GMEB1
0.0548	0.0469	ERV1	GMEB1
0.0597	0.044	ERVL	GMEB1
0.1134	0.0744	L1	GMEB1
0.0719	0.1029	L2	GMEB1
0.0719	0.1366	MIR	GMEB1
0.0237	0.0663	Alu	GTF2A2
0.0211	0.1628	ERV1	GTF2A2
0.058	0.2186	L1	GTF2A2
0.0897	0.0936	Alu	GTF2B
0.141	0.0996	ERV1	GTF2B
0.0769	0.0468	ERVL	GTF2B
0.0512	0.0422	ERVL-MaLR	GTF2B
0.0512	0.0271	L1	GTF2B
0.0606	0.0923	Alu	GTF2E2
0.1111	0.1123	ERV1	GTF2E2
0.0707	0.0299	ERVL	GTF2E2
0.0505	0.0174	ERVL-MaLR	GTF2E2
0.0505	0.0324	L1	GTF2E2
0.0877	0.0343	Alu	GTF2F1
0.124	0.2119	Alu	GTF2I
0.0633	0.0853	ERVL	GTF2I
0.0527	0.0748	ERVL-MaLR	GTF2I
0.211	0.1204	L1	GTF2I
0.087	0.1746	L2	GTF2I
0.2453	0.6347	MIR	GTF2I
0.1933	0.1723	Alu	HBP1
0.0432	0.0577	ERV1	HBP1
0.0839	0.0421	L1	HBP1
0.0356	0.0727	L2	HBP1
0.0926	0.0375	Alu	HCFC1
0.0866	0.0194	ERV1	HCFC1
0.0498	0.0567	ERVL	HCFC1
0.1846	0.2127	Alu	HDAC1
0.0555	0.0445	ERVL	HDAC1
0.1192	0.0612	L1	HDAC1
0.0718	0.1134	L2	HDAC1
0.0669	0.1353	MIR	HDAC1
0.2616	0.3173	Alu	HDAC2
0.0518	0.0598	ERV1	HDAC2
0.0679	0.0742	ERVL	HDAC2
0.0509	0.051	ERVL-MaLR	HDAC2
0.2064	0.1234	L1	HDAC2
0.079	0.129	L2	HDAC2
0.0883	0.2296	MIR	HDAC2
0.0297	0.0571	hAT	HDAC2
0.0941	0.1022	Alu	HDAC3
0.0658	0.0932	ERV1	HDAC3
0.0752	0.0824	ERVL	HDAC3
0.1752	0.1186	L1	HDAC3
0.0482	0.085	L2	HDAC3
0.0552	0.1066	MIR	HDAC3
0.0352	0.0527	hAT	HDAC3
0.0857	0.1268	Alu	HDAC8
0.0269	0.2617	ERV1	HDAC8
0.0392	0.0926	ERVL	HDAC8
0.0147	0.0609	L2	HDAC8
0.0245	0.0672	MIR	HDAC8
0.2799	0.3338	Alu	HDGF
0.0507	0.0376	ERV1	HDGF
0.0527	0.0423	ERVL	HDGF
0.0649	0.0583	L1	HDGF
0.0953	0.1415	L2	HDGF
0.1237	0.1666	MIR	HDGF
0.1914	0.1712	Alu	HES1
0.0859	0.0755	ERV1	HES1
0.0898	0.067	ERVL	HES1
0.0585	0.0408	ERVL-MaLR	HES1
0.0976	0.0628	L1	HES1
0.0703	0.0819	L2	HES1
0.0468	0.0984	MIR	HES1
0.0322	0.1428	Alu	HEY1
0.0806	0.3785	ERV1	HEY1
0.0161	0.0928	ERVL	HEY1
0	0.05	ERVL-MaLR	HEY1
0.0483	0.0785	L1	HEY1
0	0.05	L2	HEY1
0	0.0571	hAT	HEY1
0	0.05	hAT-Charlie	HEY1
0.0731	0.1539	Alu	HINFP
0.0569	0.2677	ERV1	HINFP
0.0406	0.0936	ERVL	HINFP
0.0325	0.0501	ERVL-MaLR	HINFP
0.1056	0.0831	L1	HINFP
0.0243	0.074	L2	HINFP
0.0325	0.0838	MIR	HINFP
0.0416	0.0789	Alu	HIVEP1
0.038	0.2528	ERV1	HIVEP1
0.0253	0.0776	ERVL	HIVEP1
0.0271	0.0626	MIR	HIVEP1
0.2694	0.3437	Alu	HLTF
0.0551	0.0655	ERV1	HLTF
0.0422	0.0518	ERVL	HLTF
0.1071	0.1051	L1	HLTF
0.0551	0.0866	L2	HLTF
0.0454	0.0543	MIR	HLTF
0.1815	0.1239	Alu	HMBOX1
0.1567	0.0876	ERV1	HMBOX1
0.0783	0.0954	ERVL	HMBOX1
0.0476	0.0592	ERVL-MaLR	HMBOX1
0.0714	0.0731	L1	HMBOX1
0.0535	0.1022	L2	HMBOX1
0.0595	0.1494	MIR	HMBOX1
0.0347	0.0567	hAT	HMBOX1
0.1112	0.1397	Alu	HMG20A
0.088	0.0756	ERV1	HMG20A
0.068	0.0674	ERVL	HMG20A
0.051	0.0505	L1	HMG20A
0.0386	0.0701	L2	HMG20A
0.071	0.1024	MIR	HMG20A
0.0742	0.0228	Alu	HMGN3
0.0598	0.0225	ERV1	HMGN3
0.1742	0.1738	Alu	HMGXB4
0.0774	0.0744	L1	HMGXB4
0.0269	0.0596	MIR	HMGXB4
0.0303	0.1111	Alu	HNRNPH1
0	0.0505	MIR	HNRNPH1
0.065	0.1291	Alu	HNRNPK
0.1463	0.1881	L1	HNRNPK
0.1802	0.0739	Alu	HNRNPLL
0.0754	0.0239	L1	HNRNPLL
0.0245	0.0702	MIR	HNRNPLL
0.0833	0.2173	Alu	HNRNPUL1
0.0535	0.0478	ERVL	HNRNPUL1
0.119	0.1173	L1	HNRNPUL1
0.0059	0.0521	hAT	HNRNPUL1
0.0185	0.2577	ERV1	HOMEZ
0.0046	0.0501	ERVL	HOMEZ
0.0747	0.1536	Alu	HOXB6
0.0344	0.1904	ERV1	HOXB6
0.0057	0.0528	ERVL	HOXB6
0.0632	0.056	L1	HOXB6
0.0114	0.0528	L2	HOXB6
0.0114	0.0528	hAT	HOXB6
0.1047	0.1796	Alu	HSF4
0.0793	0.1362	ERV1	HSF4
0.0506	0.0922	ERVL	HSF4
0.0354	0.0534	ERVL-MaLR	HSF4
0.1013	0.0695	L1	HSF4
0.054	0.0858	L2	HSF4
0.054	0.131	MIR	HSF4
0.0236	0.0507	hAT	HSF4
0.0277	0.0614	Alu	ID3
0.0193	0.2988	ERV1	ID3
0.011	0.0726	ERVL	ID3
0.0214	0.0519	Alu	IFI16
0.0428	0.3935	ERV1	IFI16
0.0214	0.1014	ERVL	IFI16
0.0285	0.0519	L1	IFI16
0.2448	0.3059	Alu	IKZF1
0.0623	0.0591	ERV1	IKZF1
0.0802	0.0859	ERVL	IKZF1
0.049	0.0564	ERVL-MaLR	IKZF1
0.1558	0.1155	L1	IKZF1
0.0877	0.1422	L2	IKZF1
0.0456	0.1189	MIR	IKZF1
0.015	0.0838	Alu	ILK
0.0255	0.3348	ERV1	ILK
0.0195	0.098	ERVL	ILK
0.027	0.0543	L1	ILK
0.0135	0.0504	L2	ILK
0.012	0.056	MIR	ILK
0.131	0.2834	Alu	IRF1
0.0873	0.1857	ERV1	IRF1
0.0262	0.1299	ERVL	IRF1
0.0087	0.089	ERVL-MaLR	IRF1
0.0917	0.1565	L1	IRF1
0.0393	0.1413	L2	IRF1
0.0262	0.1827	MIR	IRF1
0.0043	0.0876	hAT	IRF1
0.0043	0.0618	hAT-Charlie	IRF1
0.1267	0.2516	Alu	IRF9
0.0385	0.1632	ERV1	IRF9
0.0495	0.0951	ERVL	IRF9
0.0358	0.0544	ERVL-MaLR	IRF9
0.0909	0.1158	L1	IRF9
0.022	0.0848	L2	IRF9
0.044	0.0961	MIR	IRF9
0.0779	0.0329	Alu	JUNB
0.0596	0.0399	L1	JUNB
0	0.0512	MIR	JUNB
0.144	0.099	Alu	JUND
0.0998	0.0601	ERV1	JUND
0.0883	0.0942	ERVL	JUND
0.0587	0.0628	ERVL-MaLR	JUND
0.0695	0.0682	L1	JUND
0.063	0.0857	L2	JUND
0.0506	0.0955	MIR	JUND
0.0508	0.0881	Alu	KAT8
0.0338	0.0982	ERV1	KAT8
0.0338	0.078	ERVL	KAT8
0.0847	0.0768	L1	KAT8
0.0338	0.0516	MIR	KAT8
0.2772	0.3126	Alu	KDM1A
0.0493	0.0531	ERV1	KDM1A
0.0629	0.061	ERVL	KDM1A
0.1785	0.0851	L1	KDM1A
0.0901	0.1266	L2	KDM1A
0.1054	0.2362	MIR	KDM1A
0.0561	0.0075	SVA	KDM1A
0.2488	0.3092	L1	KDM4B
0.0952	0.015	Alu	KDM5B
0.0357	0.0789	MIR	KDM5B
0.129	0.1671	Alu	KHSRP
0.2168	0.1814	L1	KHSRP
0.0663	0.0804	L2	KHSRP
0.0268	0.0625	MIR	KHSRP
0.0997	0.104	Alu	KLF1
0.0291	0.0577	ERV1	KLF1
0.0665	0.0339	L1	KLF1
0.0311	0.0548	L2	KLF1
0.0311	0.1028	MIR	KLF1
0.0344	0.099	Alu	KLF10
0.0172	0.099	ERV1	KLF10
0.0542	0.0491	Alu	KLF13
0.0348	0.1285	ERV1	KLF13
0.0775	0.0573	Alu	KLF16
0.1077	0.062	ERV1	KLF16
0.0675	0.0093	ERVK	KLF16
0.0775	0.0655	ERVL	KLF16
0.0833	0.0506	L1	KLF16
0.0244	0.0531	L2	KLF16
0.0172	0.0632	MIR	KLF16
0.0224	0.1653	Alu	KLF6
0.0448	0.523	ERV1	KLF6
0.0313	0.1705	ERVL	KLF6
0.0224	0.0782	ERVL-MaLR	KLF6
0.0403	0.082	L1	KLF6
0.0134	0.0884	L2	KLF6
0.0134	0.1064	MIR	KLF6
0.0134	0.0551	hAT	KLF6
0.1421	0.1941	Alu	L3MBTL2
0.0783	0.0637	ERV1	L3MBTL2
0.0975	0.0963	ERVL	L3MBTL2
0.0746	0.0728	ERVL-MaLR	L3MBTL2
0.1228	0.0821	L1	L3MBTL2
0.0626	0.0894	L2	L3MBTL2
0.0457	0.1283	MIR	L3MBTL2
0.0325	0.0518	hAT	L3MBTL2
0.3456	0.3262	Alu	LARP7
0.0973	0.0938	L1	LARP7
0.0604	0.0585	L2	LARP7
0.0903	0.0775	Alu	LCOR
0.0677	0.039	ERVL	LCOR
0.0508	0.0356	L2	LCOR
0.1407	0.0857	Alu	MAFF
0.0938	0.0443	ERV1	MAFF
0.0615	0.0696	ERVL	MAFF
0.1876	0.1554	L1	MAFF
0.0483	0.0687	L2	MAFF
0.0425	0.0701	MIR	MAFF
0.041	0.053	hAT	MAFF
0.1621	0.1962	Alu	MAFG
0.1171	0.0697	ERV1	MAFG
0.066	0.0975	ERVL	MAFG
0.051	0.0623	ERVL-MaLR	MAFG
0.1891	0.1938	L1	MAFG
0.075	0.1061	L2	MAFG
0.039	0.1119	MIR	MAFG
0.033	0.0674	hAT	MAFG
0.033	0.0526	hAT-Charlie	MAFG
0.1023	0.0662	Alu	MAFK
0.1401	0.0441	ERV1	MAFK
0.0472	0.0667	ERVL	MAFK
0.1401	0.1183	L1	MAFK
0.0362	0.0686	L2	MAFK
0.0251	0.0701	MIR	MAFK
0.1928	0.0951	Alu	MAX
0.0544	0.0385	ERV1	MAX
0.0729	0.0656	ERVL	MAX
0.0547	0.0478	ERVL-MaLR	MAX
0.0647	0.0353	L1	MAX
0.0438	0.0574	L2	MAX
0.0478	0.0822	MIR	MAX
0.0818	0.0981	Alu	MAZ
0.0462	0.056	ERV1	MAZ
0.0533	0.0388	ERVL	MAZ
0.0676	0.0402	L1	MAZ
0.032	0.0725	L2	MAZ
0.0391	0.1293	MIR	MAZ
0.2162	0.3086	Alu	MBD1
0.057	0.0702	ERV1	MBD1
0.1516	0.1027	L1	MBD1
0.051	0.0819	L2	MBD1
0.051	0.1299	MIR	MBD1
0.0345	0.0536	hAT	MBD1
0.1517	0.0546	ERV1	MBD2
0.0527	0.0467	ERVL	MBD2
0.094	0.1056	Alu	MCM2
0.1223	0.1608	Alu	MCM3
0.0717	0.0377	ERV1	MCM3
0.0759	0.0619	L1	MCM3
0.0379	0.0848	L2	MCM3
0.1124	0.1193	Alu	MCM5
0.071	0.0301	L1	MCM5
0.0714	0.0654	Alu	MCM7
0.2142	0.0357	L1	MCM7
0.1355	0.0447	Alu	MED1
0.0123	0.0613	Alu	MEF2A
0.1358	0.0444	ERV1	MEF2A
0.074	0.0524	ERVL	MEF2A
0.1234	0.0675	L1	MEF2A
0.0246	0.0711	MIR	MEF2A
0.103	0.2062	Alu	MEF2D
0.0979	0.1826	ERV1	MEF2D
0.0567	0.1043	ERVL	MEF2D
0.0309	0.0666	ERVL-MaLR	MEF2D
0.0721	0.0946	L1	MEF2D
0.0412	0.1	L2	MEF2D
0.0309	0.115	MIR	MEF2D
0.0729	0.1084	Alu	MEIS2
0.0887	0.0732	ERV1	MEIS2
0.0552	0.0855	ERVL	MEIS2
0.0374	0.0539	ERVL-MaLR	MEIS2
0.1025	0.0899	L1	MEIS2
0.0611	0.0924	L2	MEIS2
0.0473	0.1017	MIR	MEIS2
0.2164	0.2395	Alu	MGA
0.0695	0.0584	ERV1	MGA
0.1042	0.0874	ERVL	MGA
0.0774	0.0675	ERVL-MaLR	MGA
0.1642	0.0872	L1	MGA
0.0537	0.0946	L2	MGA
0.0584	0.1239	MIR	MGA
0.3012	0.3516	Alu	MIER1
0.0587	0.0516	ERVL	MIER1
0.173	0.132	L1	MIER1
0.0783	0.1105	L2	MIER1
0.0644	0.1354	MIR	MIER1
0.3358	0.4147	Alu	MLLT1
0.0589	0.0529	ERV1	MLLT1
0.1666	0.1118	L1	MLLT1
0.0479	0.0915	L2	MLLT1
0.0404	0.0898	MIR	MLLT1
0.0186	0.0698	Alu	MLX
0.1918	0.2383	Alu	MNT
0.0701	0.0497	ERV1	MNT
0.075	0.0676	ERVL	MNT
0.0528	0.0504	ERVL-MaLR	MNT
0.1365	0.0826	L1	MNT
0.0479	0.0909	L2	MNT
0.0479	0.1222	MIR	MNT
0.193	0.2394	Alu	MTA1
0.0445	0.0626	ERV1	MTA1
0.0615	0.0642	ERVL	MTA1
0.1463	0.0937	L1	MTA1
0.0625	0.1059	L2	MTA1
0.0678	0.1167	MIR	MTA1
0.2105	0.2371	Alu	MTA2
0.0508	0.057	ERV1	MTA2
0.107	0.0678	L1	MTA2
0.0635	0.086	L2	MTA2
0.0471	0.0863	MIR	MTA2
0.1938	0.2149	Alu	MTF1
0.0738	0.223	ERV1	MTF1
0.0307	0.0755	ERVL	MTF1
0.0492	0.0748	L1	MTF1
0.0215	0.052	L2	MTF1
0.0615	0.0711	MIR	MTF1
0.0141	0.0652	ERV1	MXD1
0.0662	0.0277	Alu	MXI1
0.0828	0.0302	ERV1	MXI1
0.1891	0.1407	Alu	MYBL2
0.09	0.1222	ERV1	MYBL2
0.063	0.0608	ERVL	MYBL2
0.099	0.0645	L1	MYBL2
0.018	0.0592	MIR	MYBL2
0.0648	0.098	Alu	MYC
0.0204	0.1284	ERV1	MYC
0.0102	0.0549	L2	MYC
0.017	0.0735	MIR	MYC
0.1666	0.0645	Alu	MYNN
0.0055	0.05	L2	MYNN
0.2179	0.2639	Alu	NBN
0.0782	0.0612	ERV1	NBN
0.074	0.0565	ERVL	NBN
0.0552	0.0365	ERVL-MaLR	NBN
0.1793	0.1095	L1	NBN
0.0667	0.0976	L2	NBN
0.0667	0.1111	MIR	NBN
0.2398	0.256	Alu	NCOA1
0.0731	0.0578	ERV1	NCOA1
0.0704	0.0528	ERVL	NCOA1
0.107	0.0696	L1	NCOA1
0.0474	0.0901	L2	NCOA1
0.0392	0.1087	MIR	NCOA1
0.1025	0.1021	Alu	NCOA2
0.0341	0.0576	ERV1	NCOA2
0.0683	0.0345	ERVL	NCOA2
0.0512	0.0176	ERVL-MaLR	NCOA2
0.0598	0.0552	L1	NCOA2
0.0427	0.0622	L2	NCOA2
0.0598	0.0414	MIR	NCOA2
0.1398	0.1383	Alu	NCOA4
0.1042	0.077	L1	NCOA4
0.0213	0.0637	MIR	NCOA4
0.0802	0.0238	L1	NCOA6
0.1716	0.2379	Alu	NCOR1
0.0903	0.0946	ERV1	NCOR1
0.0692	0.0864	ERVL	NCOR1
0.0391	0.0519	ERVL-MaLR	NCOR1
0.0813	0.092	L1	NCOR1
0.0722	0.1063	L2	NCOR1
0.0542	0.1213	MIR	NCOR1
0.0722	0.011	SVA	NCOR1
0.0391	0.0515	hAT	NCOR1
0.1162	0.0384	Alu	NELFE
0.093	0.0256	ERVL	NELFE
0.0532	0.0251	ERV1	NEUROD1
0.0319	0.0505	MIR	NEUROD1
0.3333	0.2808	Alu	NFATC3
0.0952	0.0972	ERV1	NFATC3
0.0761	0.0684	ERVL	NFATC3
0.0571	0.0409	ERVL-MaLR	NFATC3
0.0857	0.1202	L1	NFATC3
0.1142	0.1055	L2	NFATC3
0.0761	0.0998	MIR	NFATC3
0.038	0.0639	hAT	NFATC3
0.038	0.0505	hAT-Charlie	NFATC3
0.1817	0.1138	Alu	NFE2
0.0754	0.0516	ERV1	NFE2
0.0719	0.0768	ERVL	NFE2
0.0799	0.1068	L1	NFE2
0.0352	0.0653	L2	NFE2
0.0377	0.073	MIR	NFE2
0.0456	0.1379	Alu	NFE2L1
0.0507	0.1199	ERV1	NFE2L1
0.0304	0.0961	ERVL	NFE2L1
0.0913	0.2253	L1	NFE2L1
0.0076	0.0692	L2	NFE2L1
0.0177	0.0825	MIR	NFE2L1
0.1278	0.1565	Alu	NFIX
0.03	0.084	ERV1	NFIX
0.0112	0.0747	ERVL	NFIX
0.1578	0.1481	L1	NFIX
0.0131	0.0807	L2	NFIX
0.0056	0.1114	MIR	NFIX
0.0187	0.0549	hAT	NFIX
0.1904	0.297	Alu	NFRKB
0.1005	0.0891	ERV1	NFRKB
0.1058	0.0842	ERVL	NFRKB
0.0846	0.0592	ERVL-MaLR	NFRKB
0.1481	0.1262	L1	NFRKB
0.0634	0.1264	L2	NFRKB
0.074	0.1676	MIR	NFRKB
0.0423	0.066	hAT	NFRKB
0.1142	0.1154	Alu	NFXL1
0.0714	0.0208	ERV1	NFXL1
0.0714	0.049	L1	NFXL1
0.0142	0.0543	L2	NFXL1
0.0285	0.2172	MIR	NFXL1
0.2622	0.2418	ERV1	NFYA
0.0977	0.1191	ERVL	NFYA
0.0888	0.1136	ERVL-MaLR	NFYA
0.0497	0.0552	Alu	NFYB
0.6861	0.3801	ERV1	NFYB
0.0779	0.1943	ERVL	NFYB
0.0714	0.1838	ERVL-MaLR	NFYB
0.2184	0.1673	Alu	NKRF
0.0648	0.0533	L2	NKRF
0.0409	0.0704	MIR	NKRF
0.0921	0.0284	L1	NR0B1
0.0196	0.0666	Alu	NR1H2
0.2033	0.1926	Alu	NR2C1
0.0423	0.0537	ERV1	NR2C1
0.0508	0.0525	ERVL	NR2C1
0.1483	0.0722	L1	NR2C1
0.0508	0.0893	L2	NR2C1
0.055	0.1148	MIR	NR2C1
0.0635	0.0099	SVA	NR2C1
0.0562	0.0564	Alu	NR2C2
0.0714	0.0277	L1	NR2C2
0.2214	0.2684	Alu	NR2F1
0.0875	0.0833	ERV1	NR2F1
0.0681	0.0878	ERVL	NR2F1
0.0389	0.0593	ERVL-MaLR	NR2F1
0.1532	0.0987	L1	NR2F1
0.0851	0.1068	L2	NR2F1
0.0583	0.1542	MIR	NR2F1
0.0486	0.0556	hAT	NR2F1
0.3612	0.1183	Alu	NR2F2
0.1038	0.0567	ERV1	NR2F2
0.0591	0.0663	ERVL	NR2F2
0.0835	0.0525	L1	NR2F2
0.0358	0.071	L2	NR2F2
0.0454	0.1074	MIR	NR2F2
0.0557	0.0618	Alu	NR2F6
0.0239	0.095	ERV1	NR2F6
0.2628	0.3097	Alu	NR3C1
0.1085	0.085	L1	NR3C1
0.0457	0.0582	L2	NR3C1
0.1421	0.0928	Alu	NR4A1
0.0519	0.0513	ERV1	NR4A1
0.0346	0.0661	L2	NR4A1
0.0415	0.1089	MIR	NR4A1
0.1385	0.1338	Alu	NRF1
0.0582	0.051	ERV1	NRF1
0.0963	0.0582	L1	NRF1
0.0662	0.0635	L2	NRF1
0.0461	0.112	MIR	NRF1
0.0357	0.1091	Alu	NUFIP1
0.0535	0.1001	ERV1	NUFIP1
0.0535	0.0518	ERVL	NUFIP1
0.0535	0.059	L1	NUFIP1
0.0714	0.0465	L2	NUFIP1
0.0535	0.0178	MIR	NUFIP1
0.1142	0.1113	Alu	OTX1
0.0375	0.0587	ERV1	OTX1
0.0678	0.0336	L1	OTX1
0.0408	0.0712	Alu	PATZ1
0.0272	0.1754	ERV1	PATZ1
0.0068	0.0633	ERVL	PATZ1
0.105	0.1494	Alu	PBX2
0.0942	0.0865	ERV1	PBX2
0.0652	0.0983	ERVL	PBX2
0.0458	0.0628	ERVL-MaLR	PBX2
0.1268	0.1139	L1	PBX2
0.0615	0.1013	L2	PBX2
0.0724	0.1168	MIR	PBX2
0.0277	0.0602	hAT	PBX2
0.055	0.0279	Alu	PCBP1
0.0647	0.0907	Alu	PCBP2
0.1975	0.2022	L1	PCBP2
0.0273	0.0565	L2	PCBP2
0.0469	0.1008	Alu	PHB
0.1764	0.1894	Alu	PHB2
0.0924	0.0928	ERV1	PHB2
0.0504	0.0615	ERVL	PHB2
0.1092	0.0644	L1	PHB2
0.042	0.0895	L2	PHB2
0.0084	0.0516	MIR	PHB2
0.0732	0.1182	Alu	PHF20
0.0732	0.0391	L1	PHF20
0.0239	0.1129	MIR	PHF20
0.0577	0.123	Alu	PHF21A
0.0316	0.0506	Alu	PHTF2
0.0271	0.1139	ERV1	PHTF2
0.1683	0.1957	Alu	PKNOX1
0.0841	0.0782	ERV1	PKNOX1
0.0833	0.0942	ERVL	PKNOX1
0.0563	0.0622	ERVL-MaLR	PKNOX1
0.1525	0.1087	L1	PKNOX1
0.0937	0.1092	L2	PKNOX1
0.0698	0.116	MIR	PKNOX1
0.0405	0.0552	hAT	PKNOX1
0.242	0.0994	Alu	PML
0.1026	0.0549	ERV1	PML
0.0713	0.0558	ERVL	PML
0.0513	0.0342	ERVL-MaLR	PML
0.0946	0.0613	L1	PML
0.0424	0.0636	L2	PML
0.0419	0.0842	MIR	PML
0.538	0.2397	Alu	POLR2A
0.045	0.053	ERVL	POLR2A
0.0643	0.0555	L1	POLR2A
0.0356	0.0774	L2	POLR2A
0.0316	0.0891	MIR	POLR2A
0.3865	0.2771	Alu	POLR2AphosphoS2
0.0506	0.0654	ERVL	POLR2AphosphoS2
0.1284	0.1186	L1	POLR2AphosphoS2
0.0602	0.102	L2	POLR2AphosphoS2
0.0588	0.1177	MIR	POLR2AphosphoS2
0.0363	0.0658	hAT	POLR2AphosphoS2
0.0323	0.056	hAT-Charlie	POLR2AphosphoS2
0.4952	0.2265	Alu	POLR2AphosphoS5
0.0528	0.0587	ERVL	POLR2AphosphoS5
0.0818	0.0737	L1	POLR2AphosphoS5
0.0451	0.0794	L2	POLR2AphosphoS5
0.0318	0.0852	MIR	POLR2AphosphoS5
0.3098	0.4149	Alu	POLR2B
0.0804	0.0641	ERVL	POLR2B
0.0586	0.0444	ERVL-MaLR	POLR2B
0.1557	0.1296	L1	POLR2B
0.082	0.1321	L2	POLR2B
0.0636	0.139	MIR	POLR2B
0.0318	0.0702	hAT	POLR2B
0.0217	0.0588	hAT-Charlie	POLR2B
0.3376	0.1509	Alu	POLR2G
0.0598	0.0409	L1	POLR2G
0.0279	0.0857	MIR	POLR2G
0.2239	0.2577	Alu	POLR2H
0.164	0.0785	ERV1	POLR2H
0.0559	0.0674	ERVL	POLR2H
0.193	0.1333	L1	POLR2H
0.054	0.0951	L2	POLR2H
0.0366	0.1373	MIR	POLR2H
0.0424	0.0699	hAT	POLR2H
0.0308	0.0544	hAT-Charlie	POLR2H
0.4513	0.4659	Alu	POLR3A
0.053	0.0785	ERV1	POLR3A
0.0884	0.1169	L1	POLR3A
0.0707	0.0575	L2	POLR3A
0.0176	0.1343	MIR	POLR3A
0.0442	0.0767	hAT	POLR3A
0	0.1363	Alu	POLR3G
0.0705	0.0182	Alu	POU5F1
0.0797	0.0452	Alu	PPARD
0.0429	0.2412	ERV1	PPARD
0.1226	0.3165	L1	PPARD
0.1868	0.227	Alu	PRDM10
0.0898	0.0632	ERV1	PRDM10
0.0995	0.0869	ERVL	PRDM10
0.0825	0.062	ERVL-MaLR	PRDM10
0.1043	0.0842	L1	PRDM10
0.0461	0.0817	L2	PRDM10
0.0315	0.0847	MIR	PRDM10
0.0673	0.0258	Alu	PRMT5
0.0727	0.0421	Alu	PRPF4
0.1609	0.1247	Alu	PTBP1
0.0976	0.1298	L2	PTBP1
0.1767	0.3544	MIR	PTBP1
0.049	0.1964	Alu	PTRF
0.0539	0.4524	ERV1	PTRF
0.0196	0.1217	ERVL	PTRF
0.0098	0.06	ERVL-MaLR	PTRF
0.049	0.0815	L1	PTRF
0.0196	0.0622	L2	PTRF
0.0245	0.0673	MIR	PTRF
0.0569	0.2131	Alu	PTTG1
0.0975	0.5013	ERV1	PTTG1
0.0162	0.1609	ERVL	PTTG1
0.0081	0.0793	ERVL-MaLR	PTTG1
0.065	0.1011	L1	PTTG1
0	0.081	L2	PTTG1
0	0.0826	MIR	PTTG1
0.0555	0.056	L1	RAD21
0.0333	0.0563	MIR	RAD21
0.0407	0.0514	hAT	RAD21
0.1262	0.1274	Alu	RAD51
0.0582	0.0267	ERVK	RAD51
0.2427	0.2904	ERVL	RAD51
0.2038	0.2661	ERVL-MaLR	RAD51
0.1553	0.0596	L1	RAD51
0.0873	0.0644	L2	RAD51
0.0873	0.1022	MIR	RAD51
0.0996	0.0404	Alu	RB1
0.0664	0.0132	ERV1	RB1
0.0153	0.0809	MIR	RB1
0.2821	0.1142	Alu	RBBP5
0.0754	0.0422	ERV1	RBBP5
0.0555	0.0488	ERVL	RBBP5
0.08	0.0415	L1	RBBP5
0.0314	0.0798	L2	RBBP5
0.0437	0.1109	MIR	RBBP5
0.3907	0.2178	Alu	RBFOX2
0.0594	0.0392	ERV1	RBFOX2
0.0865	0.0605	L1	RBFOX2
0.0367	0.0821	L2	RBFOX2
0.0371	0.1353	MIR	RBFOX2
0.0675	0	hAT	RBM15
0.1295	0.102	Alu	RBM22
0.0948	0.0835	L1	RBM22
0.0538	0.0629	MIR	RBM22
0.2569	0.2135	Alu	RBM25
0.0718	0.0881	ERVL	RBM25
0.0597	0.0742	ERVL-MaLR	RBM25
0.3575	0.2425	L1	RBM25
0.0901	0.1269	L2	RBM25
0.2209	0.4256	MIR	RBM25
0	0.0526	MIR	RBM34
0.125	0	hAT	RBM34
0.1183	0.0933	Alu	RBM39
0.051	0.0323	ERV1	RBM39
0.02	0.0577	L2	RBM39
0.0346	0.0753	MIR	RBM39
0.0561	0.084	Alu	RBPJ
0.028	0.126	ERV1	RBPJ
0.1047	0.0658	Alu	RCOR1
0.0603	0.0428	ERV1	RCOR1
0.0393	0.0664	L2	RCOR1
0.1073	0.1582	MIR	RCOR1
0.0794	0.1883	Alu	RELA
0.0327	0.2711	ERV1	RELA
0.0233	0.12	ERVL	RELA
0.0186	0.0605	ERVL-MaLR	RELA
0.028	0.0722	L1	RELA
0.0186	0.0838	L2	RELA
0.0373	0.1311	MIR	RELA
0.0758	0.0906	Alu	REST
0.0524	0.0615	ERV1	REST
0.0446	0.0505	ERVL	REST
0.0375	0.0722	L2	REST
0.0508	0.0999	MIR	REST
0.087	0.143	Alu	RFX1
0.0824	0.1094	ERV1	RFX1
0.0482	0.0814	ERVL	RFX1
0.1197	0.107	L1	RFX1
0.0342	0.0768	L2	RFX1
0.0311	0.1109	MIR	RFX1
0.0233	0.0539	hAT	RFX1
0.0303	0.0978	Alu	RFX5
0	0.064	ERV1	RFX5
0.0606	0.0053	ERVK	RFX5
0.0303	0.0747	ERVL	RFX5
0	0.0622	ERVL-MaLR	RFX5
0.0606	0.0836	L1	RFX5
0.0303	0.0622	MIR	RFX5
0.0359	0.1033	Alu	RFX7
0.0143	0.1322	ERV1	RFX7
0.0821	0.1345	Alu	RHOXF2B
0.0566	0.1265	ERV1	RHOXF2B
0.0339	0.0559	ERVL	RHOXF2B
0.0594	0.0391	L1	RHOXF2B
0.0424	0.0583	L2	RHOXF2B
0.0396	0.08	MIR	RHOXF2B
0.0899	0.1328	Alu	RLF
0.0755	0.0406	L1	RLF
0.0359	0.1197	MIR	RLF
0.2151	0.4113	Alu	RNF2
0.3459	0.3531	L1	RNF2
0.0316	0.0656	L2	RNF2
0.0548	0.0799	MIR	RNF2
0.0337	0.0601	hAT	RNF2
0.0502	0.0409	Alu	RNF219
0.0091	0.1465	ERV1	RNF219
0.0675	0.071	Alu	RREB1
0.0261	0.1478	ERV1	RREB1
0.0348	0.0739	ERVL	RREB1
0.0174	0.0649	L2	RREB1
0.0108	0.0748	MIR	RREB1
0.0704	0.0543	Alu	RUNX1
0.0211	0.0501	ERV1	RUNX1
0.0571	0.0028	hAT	SAFB
0.1938	0.054	L1	SAFB2
0	0.054	L2	SAFB2
0.1417	0.0604	Alu	SAP30
0.0266	0.0521	L2	SAP30
0.0416	0.0832	MIR	SAP30
0.0937	0.0494	Alu	SETDB1
0.0716	0.1014	ERV1	SETDB1
0.0973	0.1207	ERVL	SETDB1
0.0827	0.1072	ERVL-MaLR	SETDB1
0.0681	0.0518	L1	SETDB1
0.2857	0.1941	Alu	SFPQ
0.0357	0.0679	ERVL	SFPQ
0.1071	0.0582	L1	SFPQ
0.14	0.0681	Alu	SIN3A
0.0269	0.076	MIR	SIN3A
0.1538	0.087	ERV1	SIRT6
0.1153	0.0949	ERVL	SIRT6
0.0384	0.0501	ERVL-MaLR	SIRT6
0.0192	0.0633	L1	SIRT6
0.0192	0.0527	L2	SIRT6
0	0.0527	MIR	SIRT6
0.0551	0.1593	ERVL	SIX5
0.0482	0.1336	ERVL-MaLR	SIX5
0.0581	0.0876	Alu	SLC30A9
0.0302	0.0506	ERV1	SLC30A9
0.0302	0.103	L1	SLC30A9
0.0721	0.036	Alu	SMAD1
0.0846	0.0284	ERV1	SMAD1
0.0773	0.1165	Alu	SMAD3
0.1082	0.2288	ERV1	SMAD3
0.0876	0.0991	ERVL	SMAD3
0.0721	0.0484	ERVL-MaLR	SMAD3
0.0618	0.0629	L1	SMAD3
0.0103	0.0693	L2	SMAD3
0.036	0.0928	MIR	SMAD3
0.1373	0.1937	Alu	SMAD4
0.0712	0.0948	ERV1	SMAD4
0.0686	0.0892	ERVL	SMAD4
0.0505	0.0565	ERVL-MaLR	SMAD4
0.0893	0.0642	L1	SMAD4
0.0362	0.0891	L2	SMAD4
0.0414	0.132	MIR	SMAD4
0.0194	0.0501	hAT	SMAD4
0.187	0.0739	Alu	SMAD5
0.0817	0.0323	ERV1	SMAD5
0.0537	0.0213	L1	SMAD5
0.2422	0.3223	Alu	SMARCA4
0.0737	0.0728	ERV1	SMARCA4
0.0817	0.0913	ERVL	SMARCA4
0.0578	0.0613	ERVL-MaLR	SMARCA4
0.1764	0.1479	L1	SMARCA4
0.0737	0.1306	L2	SMARCA4
0.0513	0.1499	MIR	SMARCA4
0.0274	0.0658	hAT	SMARCA4
0.0245	0.0503	hAT-Charlie	SMARCA4
0.362	0.4728	Alu	SMARCA5
0.0444	0.0545	ERVL	SMARCA5
0.2967	0.2069	L1	SMARCA5
0.063	0.1349	L2	SMARCA5
0.0795	0.2047	MIR	SMARCA5
0.1176	0.0689	Alu	SMARCB1
0.1176	0.0344	ERV1	SMARCB1
0.1176	0.0689	ERVL	SMARCB1
0.1176	0.0517	ERVL-MaLR	SMARCB1
0.0588	0.0862	L1	SMARCB1
0.1176	0.0172	L2	SMARCB1
0.2352	0.0517	MIR	SMARCB1
0.1764	0.0172	hAT	SMARCB1
0.1176	0.0172	hAT-Charlie	SMARCB1
0.2591	0.3245	Alu	SMARCE1
0.0666	0.0693	ERV1	SMARCE1
0.0783	0.0803	ERVL	SMARCE1
0.0549	0.0537	ERVL-MaLR	SMARCE1
0.1522	0.1314	L1	SMARCE1
0.0819	0.1264	L2	SMARCE1
0.0644	0.1445	MIR	SMARCE1
0.027	0.0586	hAT	SMARCE1
0.135	0.0552	Alu	SMC3
0.07	0.0461	L1	SMC3
0.0151	0.0699	MIR	SMC3
0.0259	0.144	ERV1	SNAPC5
0.0625	0.1058	Alu	SNIP1
0.0625	0.0429	ERV1	SNIP1
0.1041	0.0357	L1	SNIP1
0.3188	0.2298	Alu	SNRNP70
0.0579	0.0149	ERVL	SNRNP70
0.0579	0.0955	MIR	SNRNP70
0.1113	0.1428	Alu	SOX6
0.0689	0.0745	ERV1	SOX6
0.0673	0.079	ERVL	SOX6
0.0432	0.0506	ERVL-MaLR	SOX6
0.1404	0.1069	L1	SOX6
0.0465	0.0821	L2	SOX6
0.039	0.1029	MIR	SOX6
0.1194	0.0708	Alu	SP1
0.0944	0.0289	ERV1	SP1
0.0555	0.0175	L1	SP1
0.0277	0.0672	MIR	SP1
0.1329	0.0189	Alu	SP2
0.0883	0.073	Alu	SPI1
0.0778	0.041	ERV1	SPI1
0.0778	0.0834	ERVL	SPI1
0.0567	0.0612	ERVL-MaLR	SPI1
0.3284	0.0911	L1	SPI1
0.0277	0.0743	L2	SPI1
0.0356	0.0792	MIR	SPI1
0.0838	0.0366	Alu	SREBF1
0.0538	0.0311	ERV1	SREBF1
0.1714	0	Alu	SREBF2
0.0876	0.062	Alu	SRF
0.0798	0.0884	ERV1	SRF
0.0706	0.0577	ERVL	SRF
0.0549	0.0443	ERVL-MaLR	SRF
0.0654	0.0302	L1	SRF
0.3529	0.0944	Alu	SRSF3
0.0515	0.0241	L1	SRSF3
0.0264	0.0625	MIR	SRSF3
0.0789	0	hAT	SRSF7
0.0246	0.0714	Alu	SRSF9
0.1063	0.0585	Alu	STAG1
0.0298	0.0666	MIR	STAG1
0.1031	0.0694	Alu	STAT5A
0.1453	0.1073	ERV1	STAT5A
0.0687	0.0833	ERVL	STAT5A
0.0748	0.0655	L1	STAT5A
0.0352	0.0709	L2	STAT5A
0.0361	0.0762	MIR	STAT5A
0.0267	0.06	Alu	STAT5B
0.0714	0.41	ERV1	STAT5B
0.0089	0.095	ERVL	STAT5B
0.0089	0.05	L1	STAT5B
0.1836	0.2269	Alu	STAT6
0.0382	0.0531	ERV1	STAT6
0.0562	0.0675	ERVL	STAT6
0.0644	0.0812	L1	STAT6
0.0387	0.0666	L2	STAT6
0.0524	0.0883	MIR	STAT6
0.3929	0.5007	Alu	SUPT5H
0.067	0.0699	ERVL	SUPT5H
0.1597	0.1771	L1	SUPT5H
0.075	0.1393	L2	SUPT5H
0.0694	0.1447	MIR	SUPT5H
0.0391	0.0776	hAT	SUPT5H
0.0327	0.0666	hAT-Charlie	SUPT5H
0.0866	0.0265	Alu	SUZ12
0.0361	0.0662	ERVL	SUZ12
0.0505	0.0246	L1	SUZ12
0.1838	0.0623	Alu	TAF1
0.0774	0.0243	ERV1	TAF1
0.1161	0.0197	L1	TAF1
0.0177	0.0521	MIR	TAF1
0.0769	0.0664	Alu	TAF15
0.0219	0.0516	MIR	TAF15
0.1246	0.1574	Alu	TAF7
0.0508	0.092	ERV1	TAF7
0.0585	0.0682	L1	TAF7
0.0203	0.0502	L2	TAF7
0.0356	0.0729	MIR	TAF7
0.0543	0.0939	Alu	TAF9B
0.0814	0.0541	ERV1	TAF9B
0.1777	0.0889	L1	TAF9B
0.0296	0.0524	L2	TAF9B
0.032	0.0664	MIR	TAF9B
0.1421	0.1648	Alu	TAL1
0.2543	0.1018	ERV1	TAL1
0.0932	0.0061	ERVK	TAL1
0.1311	0.1144	ERVL	TAL1
0.0742	0.0675	ERVL-MaLR	TAL1
0.1516	0.101	L1	TAL1
0.0379	0.117	L2	TAL1
0.0758	0.1284	MIR	TAL1
0.0695	0.0026	SVA	TAL1
0.0379	0.056	hAT	TAL1
0.0568	0.0432	Alu	TBL1XR1
0.0518	0.0272	ERV1	TBL1XR1
0.2027	0.1445	Alu	TBP
0.0899	0.0597	ERV1	TBP
0.0708	0.0379	L1	TBP
0.0209	0.0578	MIR	TBP
0.0755	0.0668	Alu	TBPL1
0.0318	0.0527	ERV1	TBPL1
0.0922	0.0419	L1	TBPL1
0.0318	0.0756	MIR	TBPL1
0.041	0.266	ERV1	TBX18
0.0164	0.0965	ERVL	TBX18
0.0109	0.0549	L2	TBX18
0.0027	0.0627	MIR	TBX18
0.1688	0.2177	Alu	TCF12
0.0933	0.1143	ERV1	TCF12
0.1111	0.1199	ERVL	TCF12
0.0577	0.071	ERVL-MaLR	TCF12
0.1511	0.11	L1	TCF12
0.0577	0.1245	L2	TCF12
0.0533	0.1479	MIR	TCF12
0.2088	0.0222	SVA	TCF12
0.0355	0.065	hAT	TCF12
0.0343	0.075	Alu	TCF15
0.0392	0.2982	ERV1	TCF15
0.0294	0.075	ERVL	TCF15
0.0441	0.0607	L1	TCF15
0.0947	0.1096	Alu	TCF3
0.0936	0.0817	ERV1	TCF3
0.0781	0.0925	ERVL	TCF3
0.0473	0.0563	ERVL-MaLR	TCF3
0.0781	0.0758	L1	TCF3
0.0296	0.0848	L2	TCF3
0.0355	0.0971	MIR	TCF3
0.1161	0.0077	SVA	TCF3
0.0648	0.0139	ERVK	TCF7
0.0378	0.06	ERVL	TCF7
0.0216	0.0567	L2	TCF7
0	0.0567	MIR	TCF7
0.0955	0.0349	Alu	TCF7L2
0.087	0.0359	L1	TCF7L2
0.0474	0.1134	Alu	TCFL5
0.0618	0.192	ERV1	TCFL5
0.0474	0.1038	ERVL	TCFL5
0.0371	0.0589	ERVL-MaLR	TCFL5
0.0721	0.0737	L1	TCFL5
0.002	0.0751	L2	TCFL5
0.0226	0.1024	MIR	TCFL5
0.0185	0.0509	hAT	TCFL5
0.0894	0.1159	Alu	TEAD1
0.099	0.1693	ERV1	TEAD1
0.0798	0.0868	ERVL	TEAD1
0.067	0.0473	ERVL-MaLR	TEAD1
0.0607	0.0597	L1	TEAD1
0.0255	0.0675	L2	TEAD1
0.0479	0.092	MIR	TEAD1
0.0412	0.1089	Alu	TEAD2
0.103	0.3392	ERV1	TEAD2
0.0412	0.1136	ERVL	TEAD2
0.0412	0.0513	ERVL-MaLR	TEAD2
0.0824	0.0677	L1	TEAD2
0	0.0544	L2	TEAD2
0.0309	0.0661	MIR	TEAD2
0.0666	0.0472	Alu	TEAD4
0.0666	0.04	L2	TEAD4
0	0.0509	MIR	TEAD4
0.075	0.1718	L1	TFAM
0.05	0.0625	L2	TFAM
0	0.0937	MIR	TFAM
0.071	0.0314	ERV1	TFAP4
0.0609	0.0382	ERVL	TFAP4
0.0304	0.0519	MIR	TFAP4
0.0726	0.0617	Alu	TFCP2
0.0558	0.1107	ERV1	TFCP2
0.0055	0.0567	MIR	TFCP2
0.1309	0.1019	Alu	TFDP1
0.1246	0.112	ERV1	TFDP1
0.0867	0.072	ERVL	TFDP1
0.0694	0.0456	ERVL-MaLR	TFDP1
0.1009	0.0573	L1	TFDP1
0.0552	0.0701	L2	TFDP1
0.052	0.1011	MIR	TFDP1
0.1488	0.1191	Alu	TFE3
0.0733	0.0478	ERV1	TFE3
0.0817	0.0041	ERVK	TFE3
0.1278	0.2308	ERVL	TFE3
0.0545	0.1951	ERVL-MaLR	TFE3
0.0922	0.1184	L1	TFE3
0.0167	0.0786	L2	TFE3
0.0314	0.1232	MIR	TFE3
0	0.0666	Alu	TGIF2
0	0.0666	L2	TGIF2
0.1548	0.0208	Alu	THAP1
0.0954	0.0726	Alu	THAP12
0.0656	0.0638	L2	THAP12
0.0807	0.1056	MIR	THAP12
0.016	0.0501	ERV1	THAP7
0.2096	0.2	Alu	THRA
0.0806	0.0327	ERV1	THRA
0.0322	0.1155	ERVL	THRA
0.0161	0.1034	ERVL-MaLR	THRA
0.0483	0.0568	L1	THRA
0	0.062	L2	THRA
0	0.1137	MIR	THRA
0.2805	0.3648	Alu	TOE1
0.0519	0.0553	ERV1	TOE1
0.0545	0.0818	ERVL	TOE1
0.0337	0.0645	ERVL-MaLR	TOE1
0.122	0.0847	L1	TOE1
0.0779	0.1233	L2	TOE1
0.1038	0.1531	MIR	TOE1
0.1921	0.2381	Alu	TRIM24
0.0714	0.1137	ERV1	TRIM24
0.096	0.1309	ERVL	TRIM24
0.0738	0.0956	ERVL-MaLR	TRIM24
0.1798	0.1714	L1	TRIM24
0.0541	0.104	L2	TRIM24
0.0467	0.0776	MIR	TRIM24
0.3106	0.3801	Alu	TRIM25
0.1306	0.0922	L1	TRIM25
0.053	0.0798	L2	TRIM25
0.0435	0.0583	MIR	TRIM25
0.2047	0.2755	Alu	TRIM28
0.0805	0.0936	ERV1	TRIM28
0.0766	0.127	ERVL	TRIM28
0.0541	0.106	ERVL-MaLR	TRIM28
0.2813	0.2476	L1	TRIM28
0.0515	0.0888	L2	TRIM28
0.0383	0.0805	MIR	TRIM28
0.12	0.057	Alu	TRIP13
0.04	0.0836	ERV1	TRIP13
0.04	0.2699	ERVL	TRIP13
0.04	0.2243	ERVL-MaLR	TRIP13
0.04	0.0608	L1	TRIP13
0.16	0.0342	L2	TRIP13
0.0555	0.0149	Alu	TSC22D4
0.0555	0.0126	L1	TSC22D4
0.0243	0.1044	Alu	TSHZ1
0.0772	0.5719	ERV1	TSHZ1
0.0365	0.1267	ERVL	TSHZ1
0.0284	0.0582	L1	TSHZ1
0.0081	0.0565	L2	TSHZ1
0.004	0.0684	MIR	TSHZ1
0.0761	0.0433	L1	U2AF1
0	0.0555	ERV1	U2AF2
0	0.0555	ERVL	U2AF2
0	0.0555	ERVL-MaLR	U2AF2
0.1	0.1666	L1	U2AF2
0	0.0555	L2	U2AF2
0.1996	0.0841	Alu	USF1
0.0792	0.0496	ERV1	USF1
0.1577	0.2046	ERVL	USF1
0.1289	0.1796	ERVL-MaLR	USF1
0.0863	0.0658	L1	USF1
0.0347	0.0565	L2	USF1
0.037	0.0782	MIR	USF1
0.0844	0.0637	Alu	USF2
0.2135	0.3203	ERVL	USF2
0.1843	0.3004	ERVL-MaLR	USF2
0.0445	0.0636	MIR	USF2
0.0801	0.0188	ERV1	VEZF1
0.0424	0.0663	MIR	VEZF1
0.2675	0.0794	Alu	WHSC1
0.0627	0.0617	ERVL	WHSC1
0.0592	0.0889	L2	WHSC1
0.0574	0.1033	MIR	WHSC1
0.074	0.1807	ERV1	XRCC3
0.0148	0.066	ERVK	XRCC3
0.0555	0.0766	ERVL	XRCC3
0.0481	0.0675	ERVL-MaLR	XRCC3
0.1703	0.2665	L1	XRCC3
0.1089	0.0548	Alu	XRCC5
0.0605	0.0156	ERV1	XRCC5
0.0217	0.0582	MIR	XRCC5
0.2326	0.2143	Alu	YBX3
0.1822	0.1338	L1	YBX3
0.2219	0.0629	Alu	YY1
0.0507	0.032	ERV1	YY1
0.1048	0.0443	L1	YY1
0.0632	0.0836	Alu	ZBED1
0.0517	0.0617	ERV1	ZBED1
0.0517	0.0457	ERVL	ZBED1
0.0708	0.2445	Alu	ZBTB11
0.022	0.1523	ERVL	ZBTB11
0.0094	0.1169	ERVL-MaLR	ZBTB11
0.0787	0.1819	L1	ZBTB11
0.0157	0.1829	L2	ZBTB11
0.0188	0.2043	MIR	ZBTB11
0.011	0.0536	TcMar	ZBTB11
0.0125	0.1257	hAT	ZBTB11
0.0094	0.1035	hAT-Charlie	ZBTB11
0.1246	0.1245	Alu	ZBTB12
0.0654	0.0969	ERV1	ZBTB12
0.0623	0.0753	ERVL	ZBTB12
0.0809	0.0504	L1	ZBTB12
0.0311	0.0689	L2	ZBTB12
0.0186	0.1009	MIR	ZBTB12
0.0788	0.1002	Alu	ZBTB17
0.0533	0.075	ERV1	ZBTB17
0.0618	0.0534	ERVL	ZBTB17
0.0831	0.0497	L1	ZBTB17
0.049	0.0654	L2	ZBTB17
0.0447	0.1156	MIR	ZBTB17
0.0341	0.0622	hAT	ZBTB17
0.017	0.0522	hAT-Charlie	ZBTB17
0.27	0.2396	Alu	ZBTB2
0.0652	0.0476	ERV1	ZBTB2
0.0563	0.0411	ERVL	ZBTB2
0.1038	0.0702	L1	ZBTB2
0.0712	0.098	L2	ZBTB2
0.0652	0.121	MIR	ZBTB2
0.1846	0.1365	Alu	ZBTB26
0.0503	0.0346	L1	ZBTB26
0.0311	0.0535	L2	ZBTB26
0.4671	0.6556	Alu	ZBTB33
0.04	0.06	ERV1	ZBTB33
0.0588	0.0725	ERVL	ZBTB33
0.0356	0.0571	ERVL-MaLR	ZBTB33
0.1653	0.1726	L1	ZBTB33
0.0394	0.0717	L2	ZBTB33
0.0425	0.0813	MIR	ZBTB33
0.0228	0.0714	Alu	ZBTB34
0.0456	0.3979	ERV1	ZBTB34
0	0.1054	ERVL	ZBTB34
0.0182	0.0578	L1	ZBTB34
0.0563	0.0787	Alu	ZBTB43
0.125	0.1566	Alu	ZBTB49
0	0.0722	MIR	ZBTB49
0.1612	0.1741	Alu	ZBTB5
0.0752	0.086	ERV1	ZBTB5
0.1182	0.0564	L1	ZBTB5
0.0698	0.0141	Alu	ZBTB7A
0.1102	0.0082	ERV1	ZBTB7A
0	0.0646	Alu	ZBTB8A
0.08	0.0099	L1	ZBTB8A
0.0797	0.0893	Alu	ZBTB9
0.0506	0.0758	ERV1	ZBTB9
0.0552	0.0529	ERVL	ZBTB9
0.0521	0.0407	L1	ZBTB9
0.0506	0.0623	L2	ZBTB9
0.0429	0.1086	MIR	ZBTB9
0.1488	0.0647	Alu	ZC3H11A
0.1337	0.1235	Alu	ZC3H4
0.1538	0.2155	Alu	ZC3H8
0.0576	0.0838	ERV1	ZC3H8
0.0384	0.0628	ERVL	ZC3H8
0.0769	0.0748	L1	ZC3H8
0.0192	0.0568	hAT	ZC3H8
0.2146	0.1872	Alu	ZEB2
0.0916	0.0807	ERV1	ZEB2
0.068	0.0668	ERVL	ZEB2
0.0549	0.0395	ERVL-MaLR	ZEB2
0.123	0.0839	L1	ZEB2
0.068	0.1048	L2	ZEB2
0.0471	0.0953	MIR	ZEB2
0.0158	0.0828	Alu	ZFP1
0.0253	0.0981	ERV1	ZFP1
0.0379	0.2873	L1	ZFP1
0.1208	0.0623	Alu	ZFP36
0.0602	0.0334	ERV1	ZFP36
0.149	0.1012	ERVL	ZFP36
0.1342	0.0862	ERVL-MaLR	ZFP36
0.0591	0.0473	L1	ZFP36
0.0413	0.1175	L2	ZFP36
0.0786	0.2177	MIR	ZFP36
0.2188	0.2911	Alu	ZFP91
0.0339	0.0549	ERV1	ZFP91
0.0566	0.0536	ERVL	ZFP91
0.0943	0.0938	L1	ZFP91
0.0754	0.1592	L2	ZFP91
0.1018	0.1374	MIR	ZFP91
0.0113	0.05	hAT	ZFP91
0.0114	0.0653	Alu	ZFPM2
0.0114	0.1036	ERV1	ZFPM2
0.1113	0.1229	Alu	ZFX
0.051	0.0263	L1	ZFX
0.0218	0.0502	L2	ZFX
0.0145	0.1	MIR	ZFX
0.0958	0.0781	Alu	ZKSCAN1
0.0777	0.2236	L2	ZKSCAN1
0.0751	0.1539	MIR	ZKSCAN1
0.0404	0.0885	Alu	ZKSCAN3
0.0323	0.2486	ERV1	ZKSCAN3
0.0161	0.0864	ERVL	ZKSCAN3
0.0688	0.0389	L1	ZKSCAN3
0.0161	0.0769	MIR	ZKSCAN3
0.2222	0.1794	Alu	ZKSCAN8
0.1111	0	ERV1	ZKSCAN8
0	0.5384	L2	ZKSCAN8
0	0.2948	MIR	ZKSCAN8
0.0543	0.0281	Alu	ZMIZ1
0.0083	0.052	MIR	ZMIZ1
0.0418	0.1561	hAT	ZMIZ1
0.0292	0.154	hAT-Charlie	ZMIZ1
0.2449	0.2996	Alu	ZMYM3
0.036	0.0568	ERVL	ZMYM3
0.5632	0.2604	L1	ZMYM3
0.0741	0.1394	L2	ZMYM3
0.1842	0.5179	MIR	ZMYM3
0.2603	0.0756	Alu	ZNF12
0.0635	0.0134	ERV1	ZNF12
0.0745	0.1505	ERVL	ZNF12
0.066	0.1437	ERVL-MaLR	ZNF12
0.0599	0.0676	MIR	ZNF12
0.8989	0.9637	Alu	ZNF121
0.0904	0.1455	L1	ZNF121
0.0239	0.052	L2	ZNF121
0.0265	0.068	MIR	ZNF121
0.1521	0.0277	Alu	ZNF124
0.1304	0.5	ERV1	ZNF124
0.0217	0.0694	L1	ZNF124
0.0253	0.1321	Alu	ZNF134
0.0304	0.1462	ERV1	ZNF134
0.0609	0.4968	ERVL	ZNF134
0.0152	0.1411	ERVL-MaLR	ZNF134
0.0304	0.0847	L1	ZNF134
0.0203	0.0627	L2	ZNF134
0.0203	0.0713	MIR	ZNF134
0.0114	0.1076	ERV1	ZNF140
0.0504	0.1025	Alu	ZNF143
0.0672	0.0169	ERV1	ZNF143
0.1008	0.192	ERVL	ZNF143
0.1008	0.1588	ERVL-MaLR	ZNF143
0	0.0517	L2	ZNF143
0.0672	0.085	MIR	ZNF143
0.0348	0.0668	Alu	ZNF146
0.9471	0.9701	L1	ZNF146
0.1133	0.1001	Alu	ZNF148
0.1048	0.0447	ERV1	ZNF148
0.0509	0.0412	ERVL	ZNF148
0.2747	0.0965	L1	ZNF148
0.0311	0.0685	L2	ZNF148
0.0453	0.1103	MIR	ZNF148
0.0127	0.1811	ERV1	ZNF174
0.0042	0.0522	ERVL	ZNF174
0.1564	0.1302	Alu	ZNF175
0.1508	0.1446	ERV1	ZNF175
0.1284	0.1204	ERVL	ZNF175
0.0912	0.0732	ERVL-MaLR	ZNF175
0.067	0.0831	L1	ZNF175
0.0521	0.0929	L2	ZNF175
0.0446	0.115	MIR	ZNF175
0.0335	0.0529	hAT	ZNF175
0.1169	0.2156	Alu	ZNF184
0.594	0.4703	L1	ZNF184
0.09	0.105	Alu	ZNF197
0.2972	0.3011	ERV1	ZNF197
0.1171	0.0983	ERVL	ZNF197
0.072	0.0392	ERVL-MaLR	ZNF197
0.072	0.0573	L1	ZNF197
0.018	0.0633	L2	ZNF197
0.063	0.0657	MIR	ZNF197
0.054	0.0325	hAT	ZNF197
0.054	0.0253	hAT-Charlie	ZNF197
0.0631	0.0949	Alu	ZNF212
0.0526	0.2756	ERV1	ZNF212
0.0105	0.0856	ERVL	ZNF212
0.058	0.178	Alu	ZNF215
0.058	0.2405	ERV1	ZNF215
0.0622	0.1545	ERVL	ZNF215
0.0497	0.0908	ERVL-MaLR	ZNF215
0.0414	0.0993	L1	ZNF215
0.029	0.1355	L2	ZNF215
0.0414	0.1605	MIR	ZNF215
0.0207	0.0704	hAT	ZNF215
0.0124	0.0502	hAT-Charlie	ZNF215
0	0.0571	L1	ZNF217
0.0454	0.0811	Alu	ZNF224
0.0909	0.1623	ERVL	ZNF224
0	0.0895	Alu	ZNF23
0.4642	0.2779	ERV1	ZNF23
0.1428	0.1119	ERVL	ZNF23
0	0.0615	L1	ZNF23
0	0.0764	L2	ZNF23
0	0.1324	MIR	ZNF23
0.1071	0.3302	hAT	ZNF23
0.0714	0.3246	hAT-Charlie	ZNF23
0.0303	0.0527	Alu	ZNF232
0.0757	0.0722	ERV1	ZNF232
0.0757	0.0256	L2	ZNF232
0.0486	0.1072	Alu	ZNF239
0.0704	0.1142	ERV1	ZNF239
0.0653	0.0863	ERVL	ZNF239
0.0448	0.0522	ERVL-MaLR	ZNF239
0.0883	0.0588	L1	ZNF239
0.023	0.0864	L2	ZNF239
0.0281	0.1235	MIR	ZNF239
0.0307	0.0784	hAT	ZNF239
0.0281	0.0667	hAT-Charlie	ZNF239
0.0779	0.1353	Alu	ZNF253
0.0399	0.1113	ERV1	ZNF253
0.0418	0.0512	ERVL	ZNF253
0.0532	0.0434	L1	ZNF253
0.0323	0.0508	L2	ZNF253
0.0323	0.0572	MIR	ZNF253
0.0701	0.0732	Alu	ZNF263
0.0426	0.0661	L2	ZNF263
0.0365	0.0659	MIR	ZNF263
0.0655	0.0776	Alu	ZNF274
0.013	0.0556	L1	ZNF277
0.0764	0.1808	Alu	ZNF280A
0.2866	0.2759	ERV1	ZNF280A
0.0955	0.0133	ERVK	ZNF280A
0.2675	0.1643	ERVL	ZNF280A
0.2484	0.147	ERVL-MaLR	ZNF280A
0.191	0.4488	L1	ZNF280A
0.0398	0.0666	Alu	ZNF280B
0.0455	0.2156	ERV1	ZNF280B
0.0151	0.0557	ERVK	ZNF280B
0.0189	0.0602	ERVL	ZNF280B
0.0948	0.2201	L1	ZNF280B
0.0928	0.1813	Alu	ZNF281
0.0794	0.1025	ERV1	ZNF281
0.0794	0.1125	ERVL	ZNF281
0.0629	0.0763	ERVL-MaLR	ZNF281
0.1434	0.137	L1	ZNF281
0.0381	0.1161	L2	ZNF281
0.0392	0.1474	MIR	ZNF281
0.0309	0.0661	hAT	ZNF281
0.0714	0.0277	Alu	ZNF282
0.0571	0	ERV1	ZNF282
0.0169	0.0712	Alu	ZNF3
0.0084	0.0541	ERV1	ZNF3
0.0169	0.1424	L2	ZNF3
0.0105	0.0726	MIR	ZNF3
0.0433	0.1793	Alu	ZNF311
0.0666	0.233	ERV1	ZNF311
0.0566	0.1435	ERVL	ZNF311
0.0566	0.0816	ERVL-MaLR	ZNF311
0.0366	0.1124	L1	ZNF311
0.0233	0.1383	L2	ZNF311
0.0266	0.1602	MIR	ZNF311
0.0166	0.0761	hAT	ZNF311
0.01	0.0532	hAT-Charlie	ZNF311
0.1631	0.1983	Alu	ZNF316
0.074	0.0602	ERV1	ZNF316
0.0602	0.0791	ERVL	ZNF316
0.0476	0.0546	ERVL-MaLR	ZNF316
0.2057	0.2347	L1	ZNF316
0.069	0.118	L2	ZNF316
0.0589	0.0935	MIR	ZNF316
0.0388	0.0598	hAT	ZNF316
0.1562	0.2224	Alu	ZNF317
0.0477	0.0567	ERV1	ZNF317
0.0506	0.0783	ERVL	ZNF317
0.0313	0.0507	ERVL-MaLR	ZNF317
0.2203	0.2783	L1	ZNF317
0.0485	0.076	L2	ZNF317
0.0492	0.0917	MIR	ZNF317
0.1846	0.1746	Alu	ZNF318
0.0615	0.0943	ERV1	ZNF318
0.0538	0.0738	ERVL	ZNF318
0.0461	0.0518	ERVL-MaLR	ZNF318
0.0769	0.0761	L1	ZNF318
0.0461	0.0753	L2	ZNF318
0.1076	0.0962	MIR	ZNF318
0.0813	0.156	Alu	ZNF319
0.0406	0.0537	ERV1	ZNF319
0.0523	0.1539	ERVL	ZNF319
0.0406	0.1212	ERVL-MaLR	ZNF319
0.0406	0.0784	L1	ZNF319
0.0232	0.0618	L2	ZNF319
0.0116	0.0748	MIR	ZNF319
0.0126	0.0969	Alu	ZNF324
0.0168	0.0725	ERV1	ZNF324
0.0126	0.0503	ERVL	ZNF324
0.1518	0.7125	L1	ZNF324
0.0205	0.1094	ERV1	ZNF347
0.0053	0.0701	Alu	ZNF354B
0.0322	0.2093	ERV1	ZNF354B
0.0053	0.068	ERVL	ZNF354B
0.2419	0.5121	L1	ZNF354B
0.0496	0.148	Alu	ZNF354C
0.0585	0.1863	L1	ZNF354C
0.6551	0.5076	Alu	ZNF384
0.0951	0.0951	L1	ZNF384
0.0365	0.0519	L2	ZNF384
0.0389	0.0577	MIR	ZNF384
0.012	0.0833	Alu	ZNF397
0.02	0.3291	ERV1	ZNF397
0.02	0.0708	ERVL	ZNF397
0.008	0.052	L2	ZNF397
0.0529	0.1366	Alu	ZNF398
0.0317	0.3656	ERV1	ZNF398
0.019	0.0899	ERVL	ZNF398
0.0529	0.0525	L1	ZNF398
0.1486	0.1568	Alu	ZNF407
0.0675	0.0376	ERV1	ZNF407
0.081	0.0602	L1	ZNF407
0.0405	0.0595	L2	ZNF407
0	0.0808	MIR	ZNF407
0.085	0.0643	Alu	ZNF408
0.0581	0.0499	L1	ZNF408
0.0701	0.13	Alu	ZNF41
0.057	0.1974	ERV1	ZNF41
0.0394	0.0885	ERVL	ZNF41
0.0482	0.0755	L1	ZNF41
0.0065	0.0615	L2	ZNF41
0.0153	0.0868	MIR	ZNF41
0.038	0.0623	Alu	ZNF431
0.441	0.6393	ERVL	ZNF431
0.441	0.636	ERVL-MaLR	ZNF431
0.0228	0.0505	L1	ZNF431
0.0086	0.076	Alu	ZNF444
0.0344	0.2396	ERV1	ZNF444
0.0129	0.0644	ERVL	ZNF444
0.0215	0.0502	L1	ZNF444
0.0201	0.1059	Alu	ZNF445
0.0376	0.233	ERV1	ZNF445
0.01	0.0889	ERVK	ZNF445
0.0125	0.0783	ERVL	ZNF445
0.0276	0.1144	L1	ZNF445
0.0199	0.0834	Alu	ZNF449
0.0447	0.3251	ERV1	ZNF449
0.0199	0.1031	ERVL	ZNF449
0.0348	0.0881	L1	ZNF449
0.0099	0.0503	MIR	ZNF449
0.0916	0.063	Alu	ZNF511
0.0358	0.0605	MIR	ZNF511
0.0389	0.0953	Alu	ZNF518B
0.0129	0.1028	ERV1	ZNF518B
0.0231	0.2068	Alu	ZNF551
0.0231	0.1149	ERV1	ZNF551
0.0092	0.0517	ERVL	ZNF551
0.1124	0.1555	Alu	ZNF561
0.0547	0.244	ERV1	ZNF561
0.0364	0.0696	ERVL	ZNF561
0.079	0.0547	L1	ZNF561
0.0151	0.0602	L2	ZNF561
0.0273	0.0854	MIR	ZNF561
0.0098	0.0647	Alu	ZNF57
0.0294	0.2187	ERV1	ZNF57
0.0098	0.0503	ERVL	ZNF57
0.0416	0.086	Alu	ZNF583
0.053	0.2357	ERV1	ZNF583
0.0492	0.0845	ERVL	ZNF583
0.0378	0.067	L1	ZNF583
0.0151	0.0585	L2	ZNF583
0.0416	0.0864	MIR	ZNF583
0.1603	0.1364	Alu	ZNF584
0.2061	0.265	ERV1	ZNF584
0.0992	0.1898	ERVL	ZNF584
0.0687	0.1218	ERVL-MaLR	ZNF584
0.061	0.0721	L1	ZNF584
0.0381	0.0958	L2	ZNF584
0.0763	0.1085	MIR	ZNF584
0.0381	0.0582	hAT	ZNF584
0.0344	0.1279	Alu	ZNF586
0.0215	0.2106	ERV1	ZNF586
0.0086	0.0511	ERVL	ZNF586
0.1592	0.145	Alu	ZNF589
0.1783	0.2077	ERV1	ZNF589
0.1146	0.1258	ERVL	ZNF589
0.0955	0.0682	ERVL-MaLR	ZNF589
0.0573	0.0716	L1	ZNF589
0.0636	0.0949	L2	ZNF589
0.0382	0.1155	MIR	ZNF589
0.0318	0.0582	hAT	ZNF589
0.116	0.2165	Alu	ZNF592
0.082	0.1052	ERV1	ZNF592
0.0986	0.1254	ERVL	ZNF592
0.0647	0.0888	ERVL-MaLR	ZNF592
0.1254	0.1463	L1	ZNF592
0.0568	0.1316	L2	ZNF592
0.0773	0.1822	MIR	ZNF592
0.0331	0.0889	hAT	ZNF592
0.0268	0.0684	hAT-Charlie	ZNF592
0.0259	0.0728	Alu	ZNF609
0.0779	0.0452	ERV1	ZNF609
0.0519	0.0393	ERVL	ZNF609
0.1338	0.1678	Alu	ZNF639
0.0845	0.0374	L1	ZNF639
0.1345	0.112	Alu	ZNF644
0.2046	0.2573	ERV1	ZNF644
0.1111	0.1166	ERVL	ZNF644
0.0526	0.0567	ERVL-MaLR	ZNF644
0.0643	0.0604	L1	ZNF644
0.035	0.0627	L2	ZNF644
0.0409	0.0825	MIR	ZNF644
0.0439	0.0741	Alu	ZNF655
0.0463	0.0836	ERV1	ZNF655
0.0536	0.0327	L1	ZNF655
0.1508	0.2237	Alu	ZNF668
0.1068	0.2136	ERV1	ZNF668
0.0922	0.1055	ERVL	ZNF668
0.0585	0.0596	ERVL-MaLR	ZNF668
0.0907	0.0861	L1	ZNF668
0.0658	0.0845	L2	ZNF668
0.0922	0.1322	MIR	ZNF668
0.0497	0.058	hAT	ZNF668
0.0769	0.1406	Alu	ZNF695
0.0445	0.2159	ERV1	ZNF695
0.0384	0.077	ERVL	ZNF695
0.0627	0.1432	Alu	ZNF696
0.0376	0.2191	ERV1	ZNF696
0.0209	0.0702	ERVL	ZNF696
0.0543	0.0558	L1	ZNF696
0.0313	0.1748	ERV1	ZNF699
0.0201	0.0509	ERVL	ZNF699
0.056	0.0288	L1	ZNF699
0.3982	0.106	Alu	ZNF7
0.1081	0.022	ERV1	ZNF7
0.075	0.0498	ERVL	ZNF7
0.0737	0.042	L1	ZNF7
0.0269	0.0682	L2	ZNF7
0.0529	0.0945	MIR	ZNF7
0.0359	0.2055	Alu	ZNF700
0.0791	0.3898	ERV1	ZNF700
0.0071	0.0889	ERVL	ZNF700
0.0287	0.0741	L1	ZNF700
0.0215	0.0508	MIR	ZNF700
0.0287	0.0508	hAT	ZNF700
0.0181	0.0748	Alu	ZNF707
0.0181	0.1096	ERV1	ZNF707
0.0302	0.4909	ERVL	ZNF707
0.0271	0.4614	ERVL-MaLR	ZNF707
0.0151	0.0537	L1	ZNF707
0.032	0.1333	Alu	ZNF717
0.032	0.0869	ERV1	ZNF717
0.0963	0.0789	Alu	ZNF740
0.0512	0.0349	L1	ZNF740
0.0361	0.0557	MIR	ZNF740
0.0873	0.0044	SVA	ZNF740
0.0141	0.0546	Alu	ZNF76
[truncated: 35 more rows]

## Sheet: Supplemental_Table_S8
Supplemental_Table_S8: Results of Allo testing on datasets across species and cell types. The columns are species, ChIP-seq target, assay type, starting read length in base pairs (read_length), fraction length trimmed (fraction_length_removed), single-end fraction of reads in peaks score (se_frip), single-end percent multi-mapped reads at full-length (se_mmr), single-end percent multi-mapped read…
species	target	assay_type	read_length	fraction_length_removed	se_frip	se_mmr	se_30_mmr	se_mmr_increase	auROC	acc_allo	acc_rc	acc_rand	pe_frip	Median_perc_error_allo	Median_perc_error_sm	Median_perc_error_umr
A. thaliana	EDM2	tf	150	0.8	0.146533	0.08	0.13	0.58	0.984038	0.517629	0.407905	0.299235	0.269927	0.0384906	0.20715	0.156425
A. thaliana	ELP1B	tf	150	0.8	0.317073	0.17	0.22	0.25	0.976916	0.942574	0.936035	0.462543	0.370375	0.0296333	0.0687822	0.103316
C. elegan	unc	tf	101	0.70297	0.00472999	0.08	0.13	0.59	0.964558	0.33768	0.281025	0.241457	0.0133773	0.183245	0.212486	0.906061
C. elegan	isw	tf	101	0.70297	0.0322509	0.08	0.17	1.02	0.988346	0.372384	0.307994	0.269477	0.0384298	0.072586	0.140651	0.527949
D. melanogaster	ctcf	tf	194	0.845361	0.166389	0.19	0.31	0.67	0.881978	0.396183	0.333268	0.227471	0.277906	0.216731	0.380641	0.682527
D. melanogaster	ken	tf	101	0.70297	0.0312877	0.13	0.21	0.57	0.998275	0.671569	0.397059	0.303922	0.0390622	0.170393	0.608342	0.553649
D. melanogaster	lov	tf	101	0.70297	0.0144556	0.12	0.22	0.78	0.998049	0.706767	0.473684	0.413534	0.0224532	0.0772665	0.192392	0.498769
human	YY1	tf	101	0.70297	0.0108103	0.08	0.22	1.96	0.997017	0.754601	0.567325	0.321274	0.0188529	0.1325	0.278637	0.49329
human	RAD21	tf	101	0.70297	0.0287666	0.05	0.14	1.58	0.998454	0.723537	0.477895	0.324564	0.0435047	0.0828394	0.278936	0.432685
human	CTCF	tf	100	0.7	0.0171614	0.08	0.22	1.91	0.998345	0.690445	0.437613	0.332728	0.0262569	0.0659869	0.30601	0.304907
mouse	CTCF	tf	75	0.6	0.264699	0.11	0.23	1.12	0.99376	0.511482	0.451882	0.291312	0.475825	0.113612	0.1217	0.281178
mouse	ZFP57	tf	150	0.8	0.0184799	0.14	0.5	2.58	0.973665	0.589673	0.350853	0.2568	0.0880842	0.219338	0.339565	0.455163
mouse	DOTL1	tf	150	0.8	0.00645871	0.04	0.29	7.19	0.980153	0.825241	0.642906	0.381715	NA	NA	NA	NA
S. cerevisiae	MCM6	tf	101	0.70297	0.0573803	0.13	0.14	0.05	0.996685	0.543615	0.501167	0.313132	0.339582	0	0.0141323	0
S. cerevisiae	CDC45	tf	101	0.70297	0.0078791	0.04	0.04	0.03	0.993637	0.632378	0.524452	0.330523	0.139823	0	0.0196906	0
A. thaliana	H3K4me2	histone	150	0.8	0.410044	0.06	0.1	0.72	0.939292	0.544098	0.508298	0.438396	0.0273687	0.337858	0.430009	0.786976
A. thaliana	H3K9ac	histone	150	0.8	0.0639513	0.22	0.32	0.48	0.859452	0.525612	0.497773	0.495917	0.495935	0.087432	0.229788	0.641403
A. thaliana	ATAC_1	atac	50	0.4	0.163116	0.38	0.44	0.14	0.973155	0.865283	0.829046	0.457969	0.684445	0.169057	0.209555	0.244848
C. elegan	H3K9me2	histone	40	0.25	0.38768	0.11	0.21	0.92	0.979662	0.419048	0.397636	0.369974	0.3675	0.00949171	0.0558515	0.0280892
C. elegan	H3K4me3	histone	51	0.411765	0.456849	0.04	0.05	0.13	0.9903	0.543848	0.50931	0.399635	0.637168	0.00178512	0.0252915	0.00364897
C. elegan	ATAC_1	atac	101	0.70297	0.085236	0.14	0.25	0.75	0.897505	0.353554	0.314272	0.262875	0.799638	0.0596786	0.0797407	0.0435355
D. melanogaster	H3K27me3	histone	51	0.411765	0.00239543	0.19	0.23	0.23	0.679879	0.609959	0.493776	0.327801	0.0175501	0.0629912	0.218685	0.293199
D. melanogaster	H3K4me2	histone	51	0.411765	0.249772	0.15	0.17	0.14	0.984142	0.451665	0.419977	0.34558	0.0108075	0.0829485	0.254321	0.320513
D. melanogaster	ATAC_1	atac	51	0.411765	0.284768	0.22	0.32	0.45	0.884928	0.426395	0.392288	0.300268	0.33533	0.569323	0.217062	0.13139
D. melanogaster	DNase_1	dnase	121	0.752066	0.303219	0.08	0.12	0.63	0.659824	0.567324	0.456502	0.279463	0.493428	0.226955	0.431034	0.562745
D. melanogaster	DNase_2	dnase	121	0.752066	0.350745	0.1	0.14	0.4	0.674356	0.524314	0.444658	0.269471	0.561297	0.252574	0.446551	0.6
human	H3K4me3	histone	100	0.7	0.466934	0.06	0.08	0.39	0.997604	0.736549	0.637043	0.351491	0.331	0.562118	0.498846	0.396155
human	H3K27me3	histone	100	0.7	0.0432739	0.08	0.19	1.3	0.983909	0.589523	0.36105	0.304122	0.0434947	0.451286	0.585437	0.885954
human	ATAC_1	atac	100	0.7	0.487736	0.12	0.2	0.73	0.986521	0.905937	0.858495	0.392085	0.575097	0.138409	0.0893567	0.123299
human	ATAC_2	atac	100	0.7	0.364298	0.11	0.2	0.89	0.982325	0.840851	0.759388	0.378932	0.400343	0.0975665	0.0883879	0.0966718
human	DNase_1	dnase	151	0.801325	0.312225	0.09	0.19	1.25	0.990713	0.76978	0.700866	0.378032	0.343018	0.0153277	0.150482	0.041078
human	DNase_2	dnase	36	0.166667	0.365935	0.17	0.18	0.07	0.984211	0.869129	0.730847	0.415857	0.368962	0.0500544	0.162222	0.0156734
mouse	H3K27ac	histone	150	0.8	0.156768	0.07	0.09	0.25	0.993304	0.723006	0.456844	0.307123	0.0261933	0.98731	0.983958	0.644118
mouse	H3K4me3	histone	50	0.4	0.474712	0.16	0.2	0.24	0.960983	0.75731	0.658351	0.364324	NA	NA	NA	NA
mouse	ATAC_1	atac	50	0.4	0.431616	0.23	0.3	0.32	0.791611	0.64136	0.590483	0.391139	0.419627	0.0710333	0.177454	0.204041
mouse	ATAC_2	atac	50	0.4	0.589599	0.11	0.12	0.13	0.992786	0.454072	0.401088	0.288693	0.376543	0.00369052	0.0727659	0.0111199
mouse	DNase_1	dnase	151	0.801325	0.210049	0.07	0.11	0.6	0.972094	0.564957	0.438038	0.275178	0.280435	0.028407	0.129359	0.0703419
mouse	DNase_2	dnase	151	0.801325	0.300089	0.12	0.25	1.13	0.980541	0.351679	0.298624	0.205141	0.420443	0.0433946	0.121902	0.0841989
S. cerevisiae	H3K4me2	histone	66	0.545455	0.401977	0.05	0.06	0.05	0.612775	0.525149	0.508794	0.442197	0.431248	0.0114349	0.0433593	0.150662
S. cerevisiae	H3K4me3	histone	66	0.545455	0.665301	0.03	0.03	0.06	0.746704	0.513917	0.501499	0.463274	0.713659	0.0403572	0.0326485	0.134519
S. cerevisiae	ATAC_1	atac	74	0.594595	0.453182	0.63	0.64	0.02	0.909251	0.696708	0.665527	0.327469	0.517233	0.00498103	0.0329336	0.0205826
